# Supplementary material for: G protein-coupled receptor 91 promotes the inflammatory response to Porphyromonas gingivalis in bone marrow-derived macrophages
Source: PubMed Central journal article supplement — Heliyon. 2024 Jul 14;10(14):e34509. doi: 10.1016/j.heliyon.2024.e34509 (PMC11577564; doi:10.1016/j.heliyon.2024.e34509), 2024-07-14

NC represents the normal control group, CP represents the Chronic periodontitis group,

Figure1 b  $\beta$ -actin

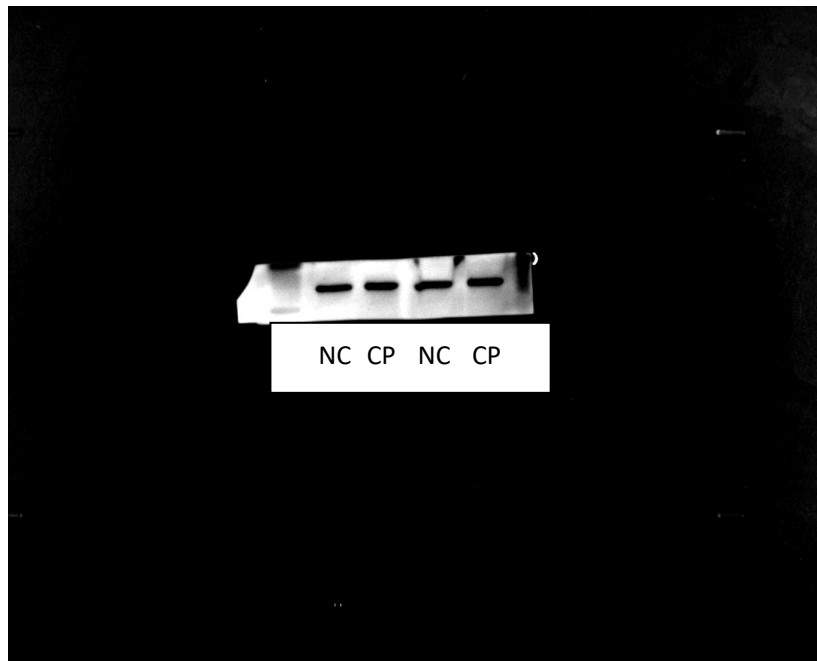

Figure1 b GPR91

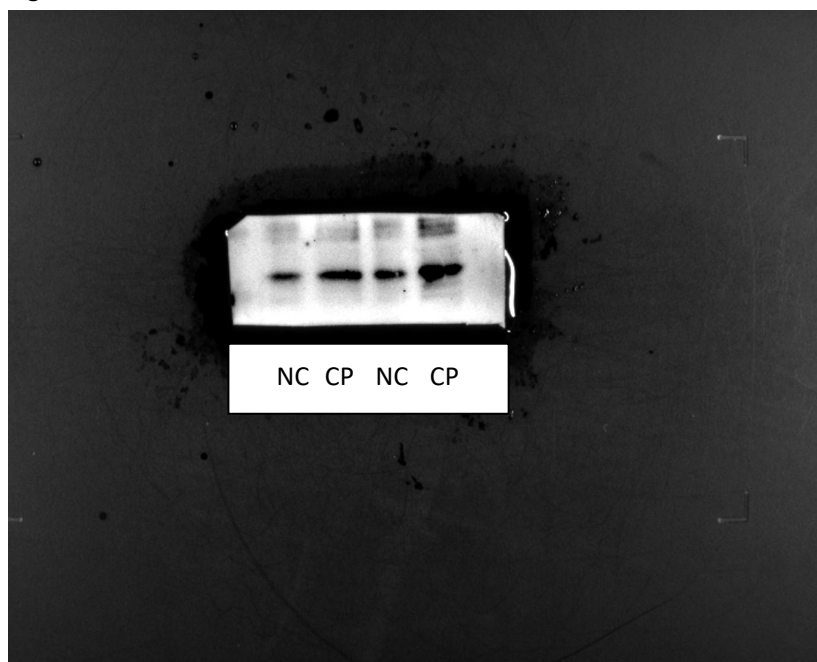

1 represents the Ctrl group, 2 represents the 4C group, 3 represents the *P.g.* group, and 4 represents the *P.g.*+4C group

Figure 2e  $\beta$ -actin

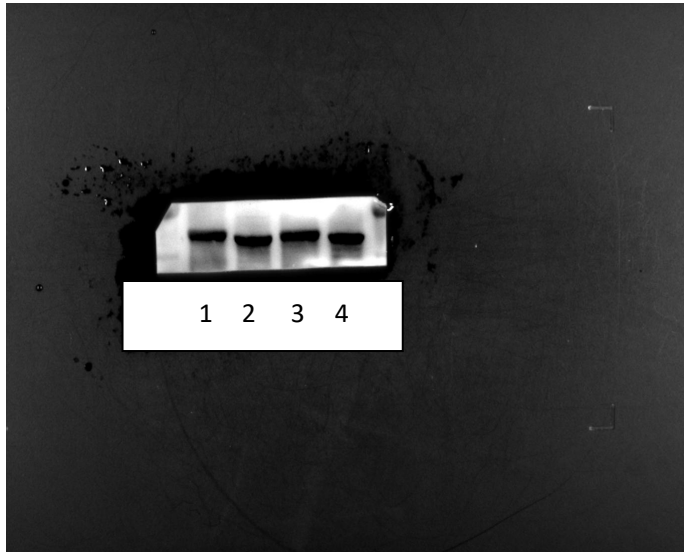

Figure 2e IL-1 $\beta$

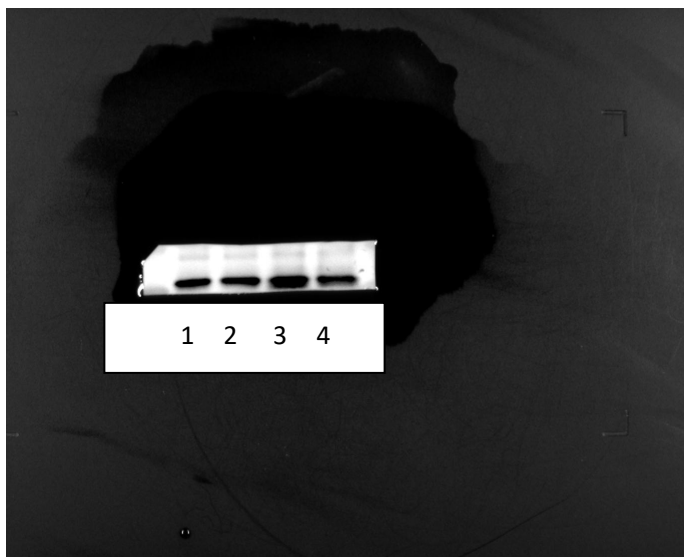

Figure 2e IL-6

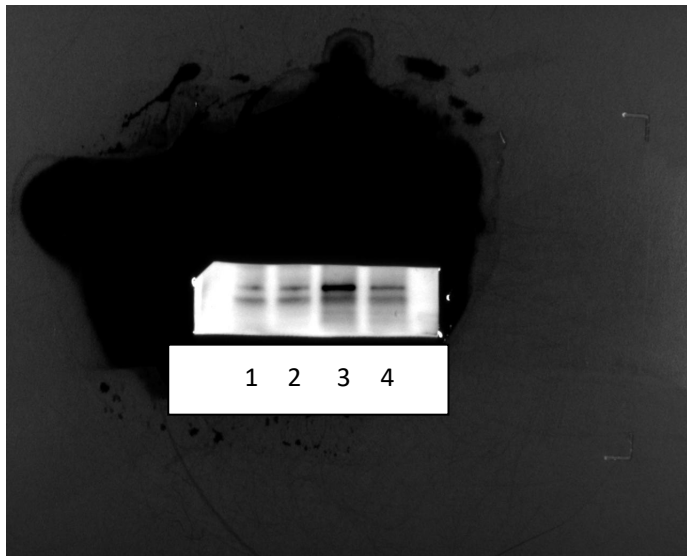

Figure 2e TNF $\alpha$

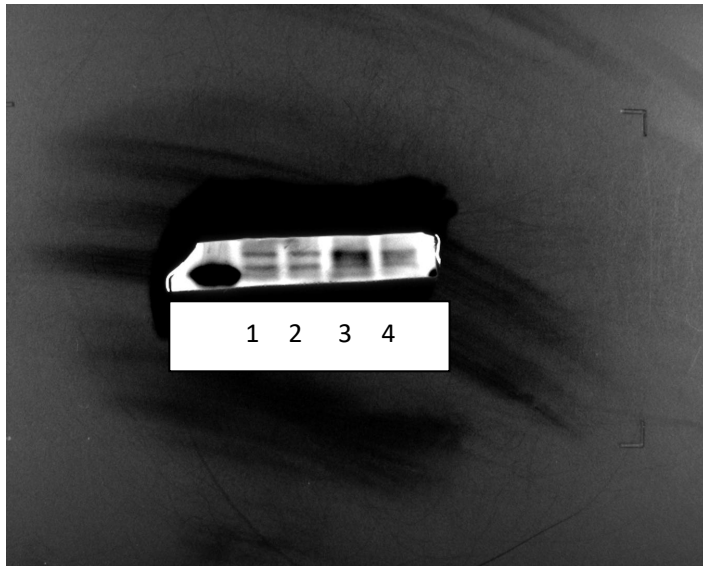

Figure 2e GPR91

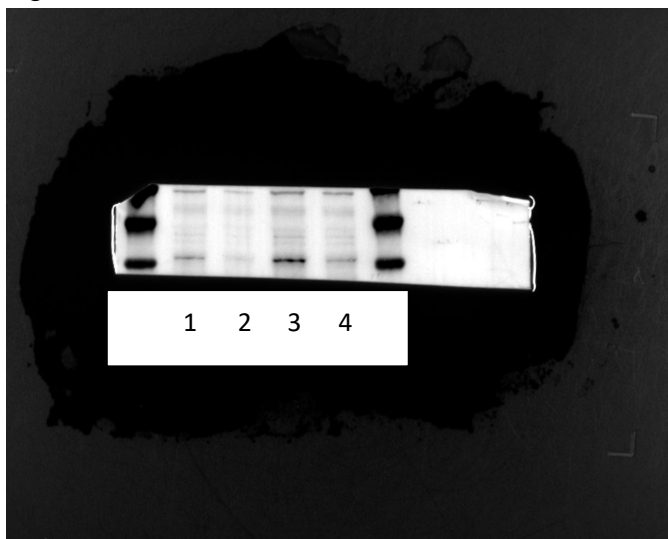

1 represents the WT group, 2 represents the GPR91<sup>-/-</sup> group, 3 represents the WT+*P.g.* group, and 4 represents the GPR91<sup>-/-</sup>+*P.g.* group

Figure 3c  $\beta$ -actin

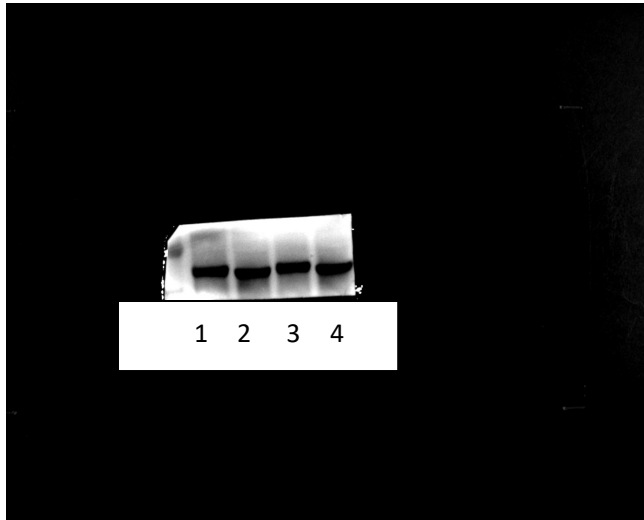

Figure 3c IL-1 $\beta$

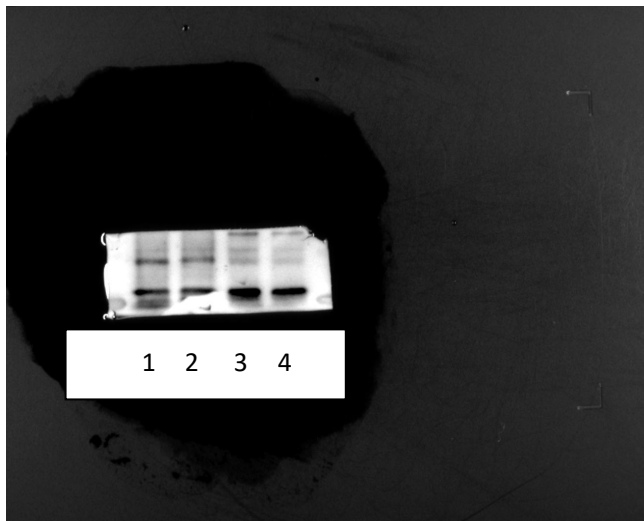

Figure 3c IL-6

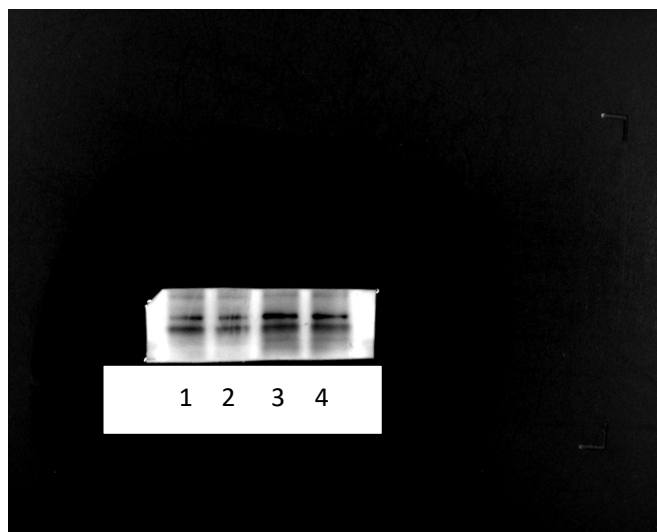

Figure 3c TNF $\alpha$

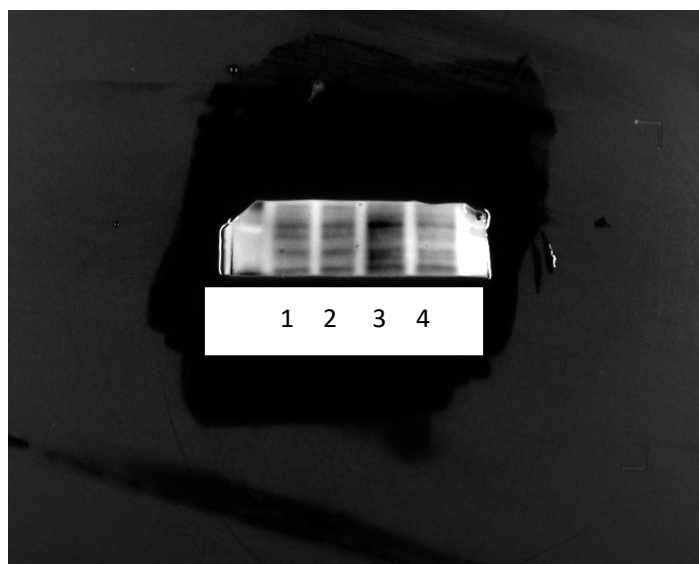

Figure 3c GPR91

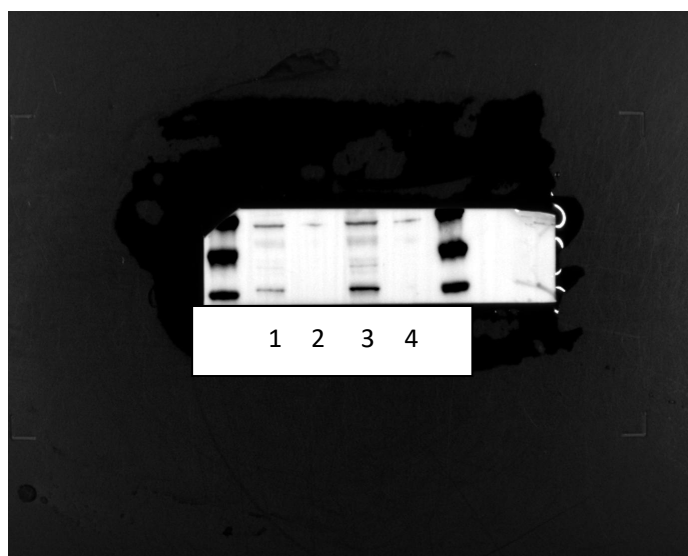

1 represents the *P.g.* (MOI=0) group, 2 represents the *P.g.* (MOI=10) group, 3 represents the *P.g.* (MOI=50) group, and 4 represents the *P.g.* (MOI=250) group

Figure 5a  $\beta$ -actin

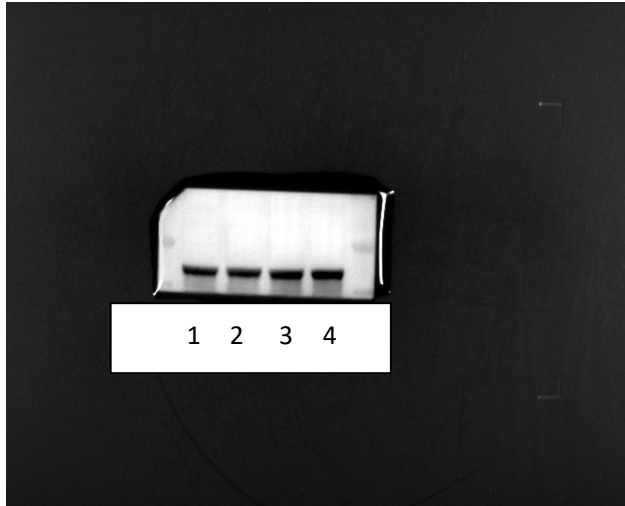

Figure 5a ERK

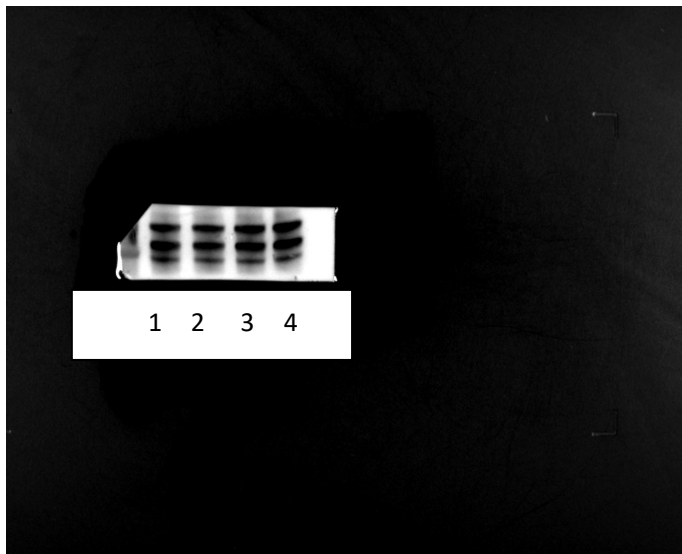

Figure 5a p-ERK

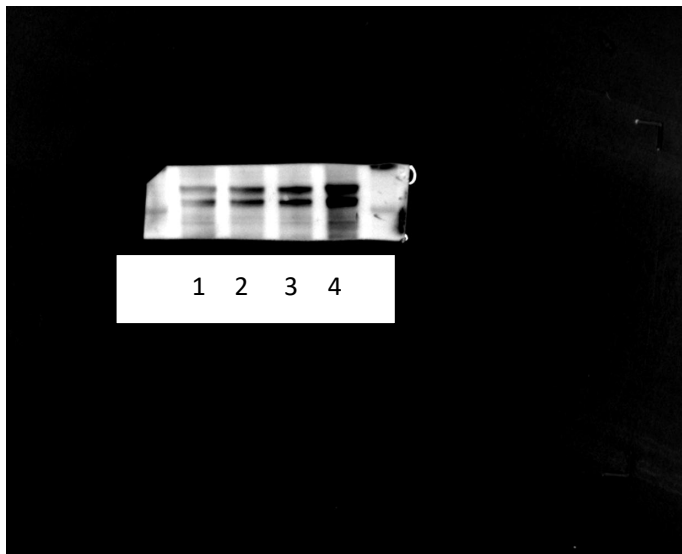

Figure 5a p65

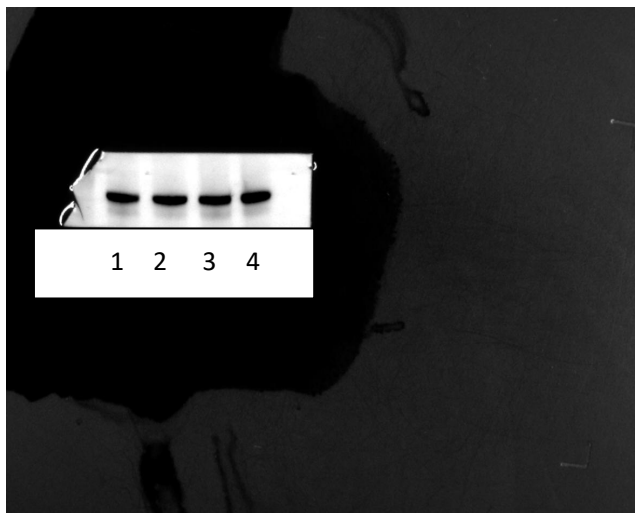

Figure 5a p-p65

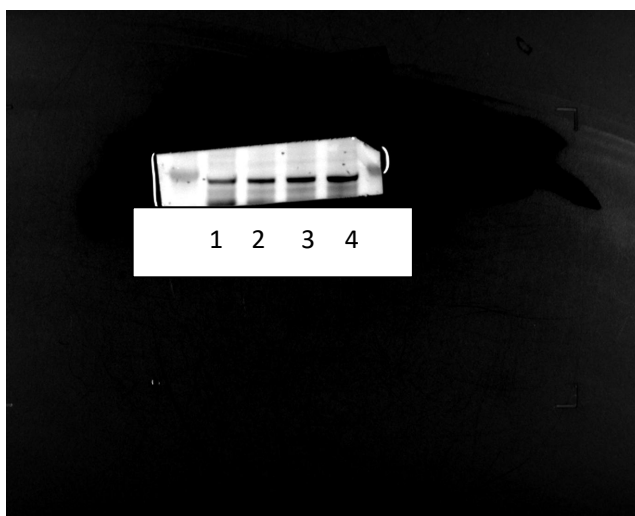

Figure 5a JNK

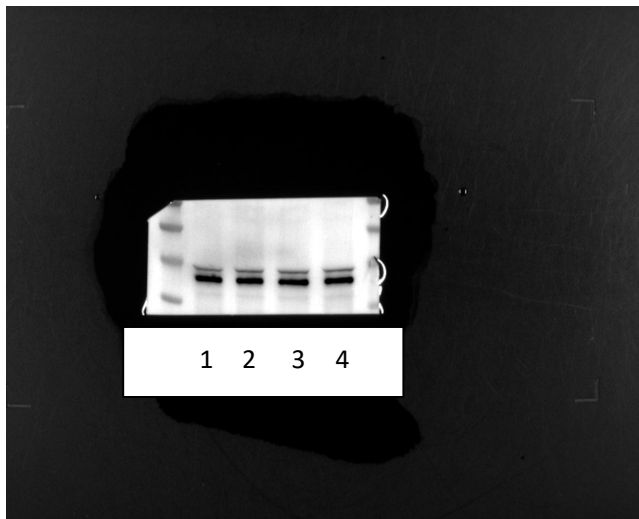

Figure 5a P-JNK

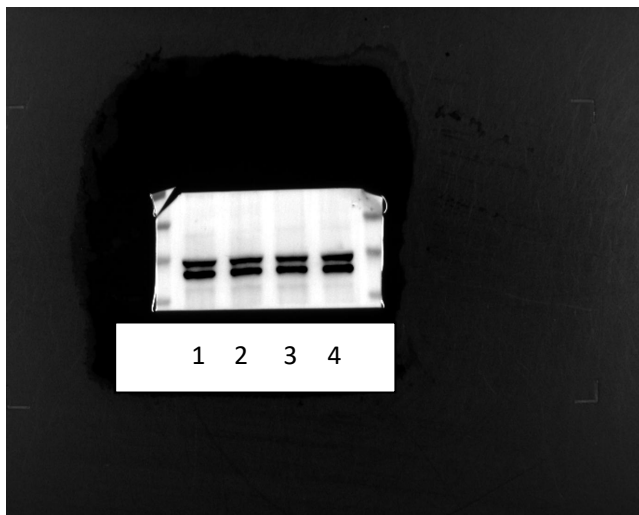

Figure 5a P38

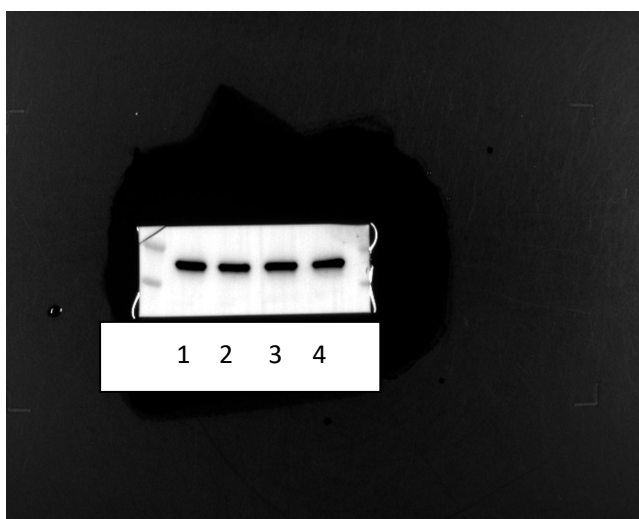



Figure 5a p-P38

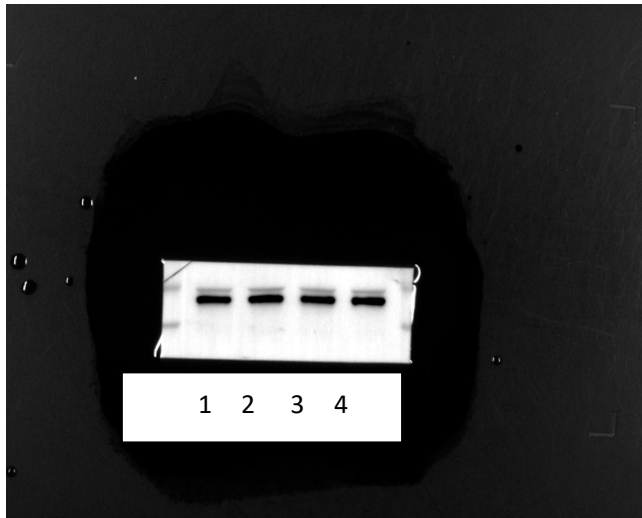

1 represents the Ctrl group, 2 represents the 4C group, 3 represents the *P.g.* group, and 4 represents the *P.g.*+4C group

Figure 5b  $\beta$ -actin

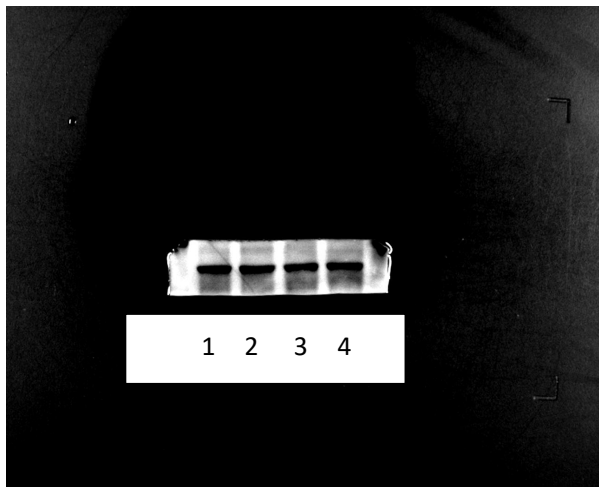

Figure 5b p-ERK

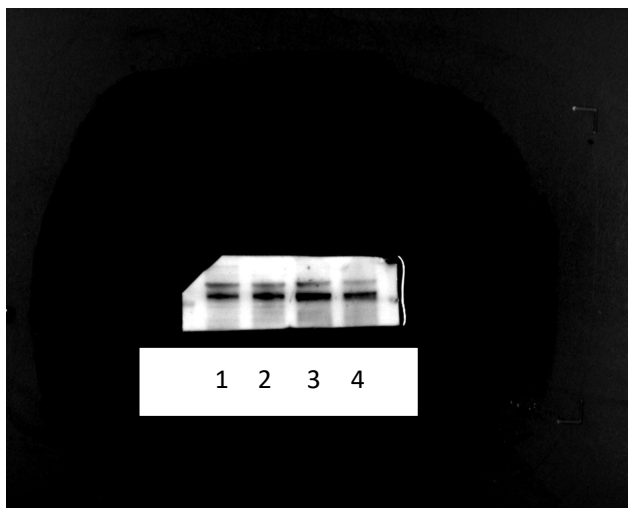

Figure 5b p-p65

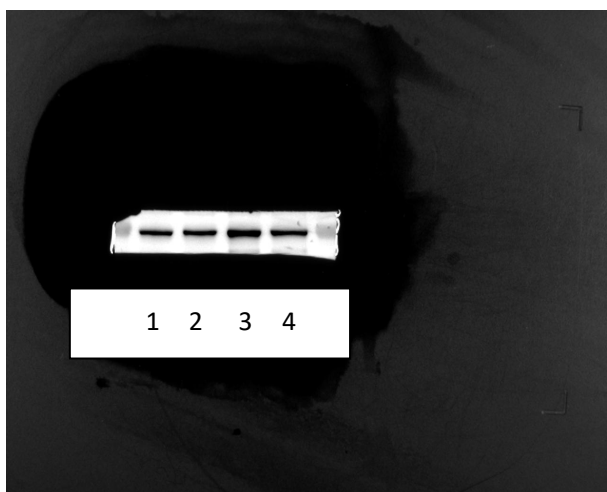

1 represents the WT group, 2 represents the GPR91<sup>-/-</sup> group, 3 represents the WT+*P.g.* group, and 4 represents the GPR91<sup>-/-</sup>+*P.g.* group

Figure 5c  $\beta$ -actin

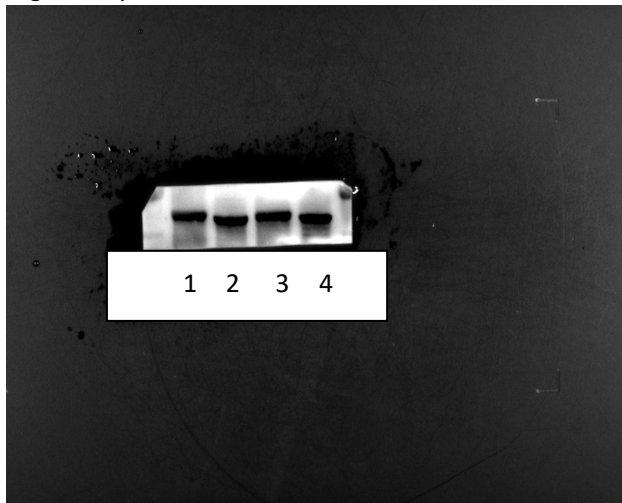

Figure 5c p-ERK

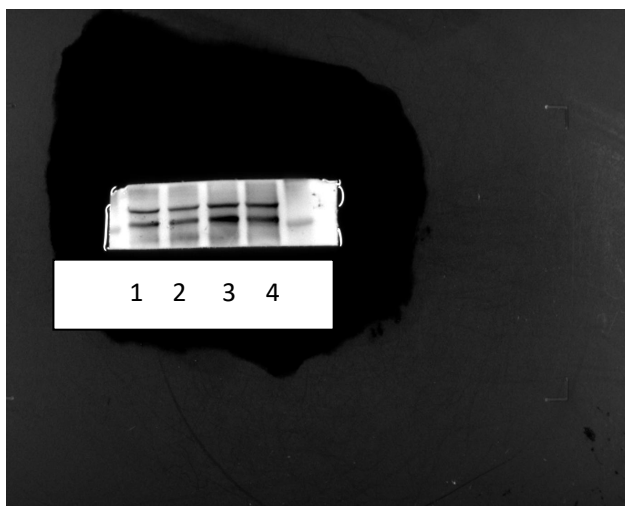

Figure 5c p-p65

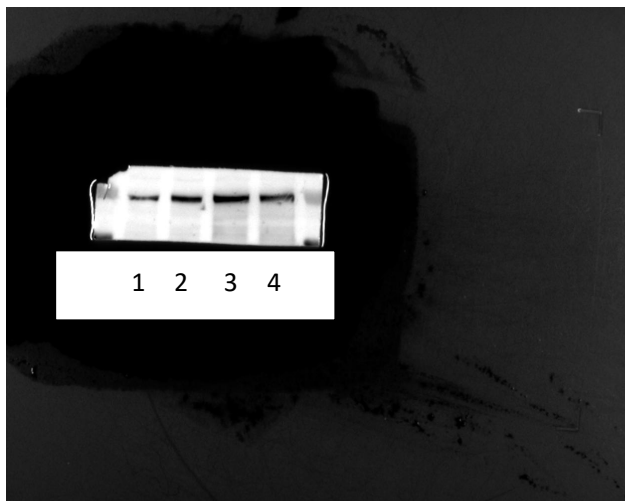

Supplement: mmc1.pdf [file mmc1.pdf]
