# Supplementary material for: G protein-coupled receptor 91 promotes the inflammatory response to Porphyromonas gingivalis in bone marrow-derived macrophages
Source: PubMed Central journal article supplement — Heliyon. 2024 Jul 14;10(14):e34509. doi: 10.1016/j.heliyon.2024.e34509 (PMC11577564; doi:10.1016/j.heliyon.2024.e34509), 2024-07-14

Figure 1c NC MERGE

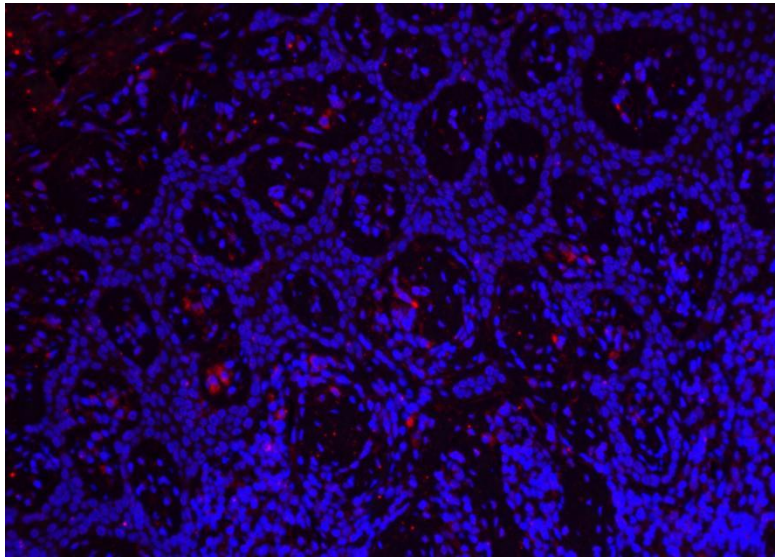

Figure 1c NC GPR91

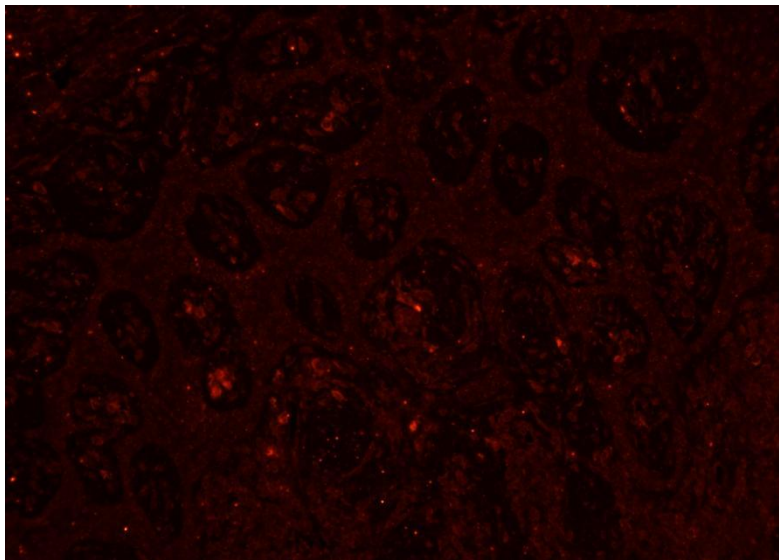

Figure 1c NC DAPI

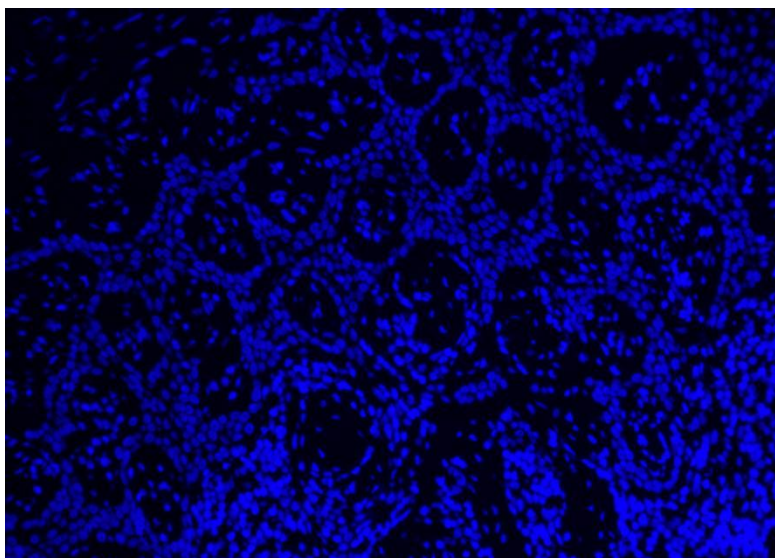

Figure 1c CP MERGE

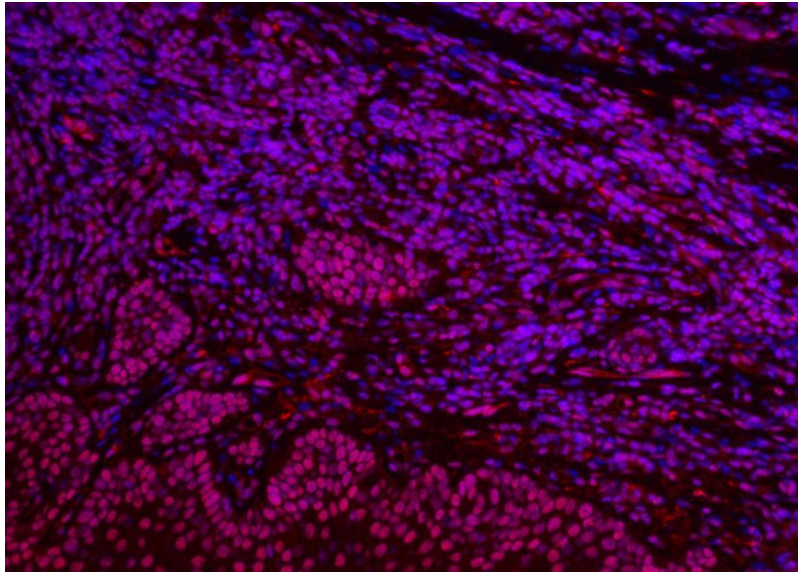

Figure 1c NC GPR91

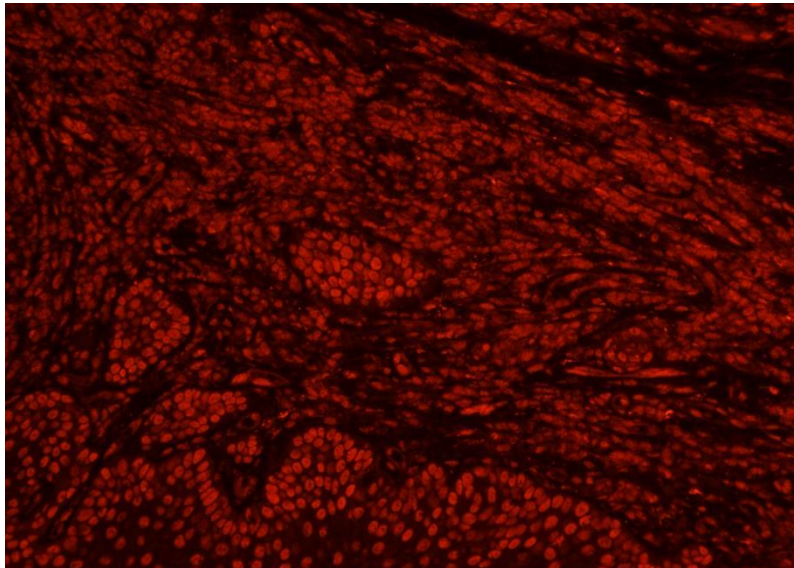

Figure 1c NC DAPI

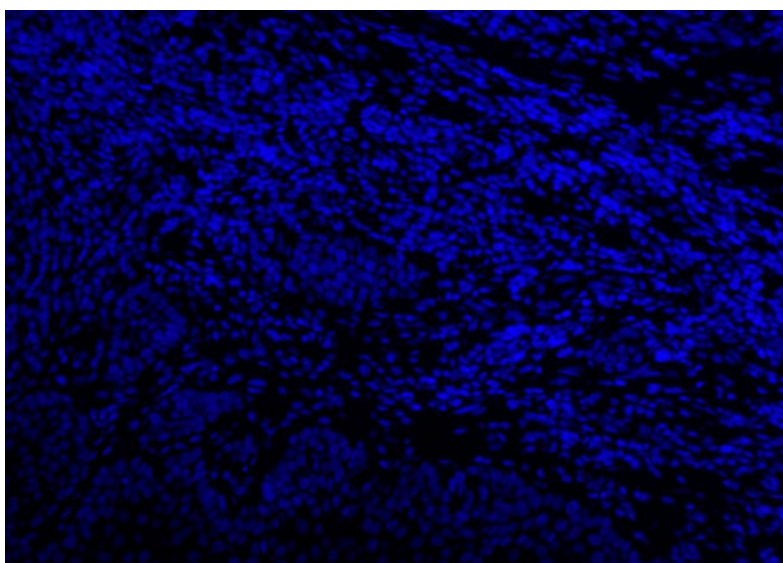



Figure 3f WT DAPI

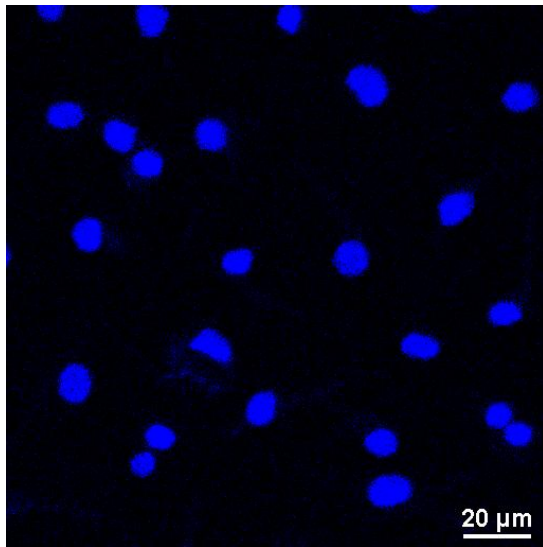

Figure 3f WT iNOS

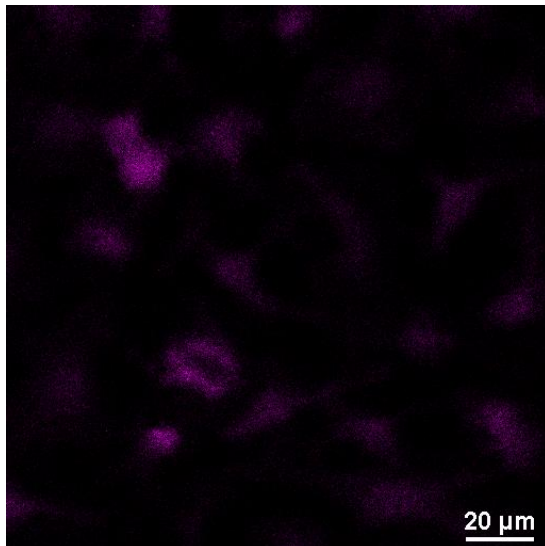

Figure 3f WT MERGE

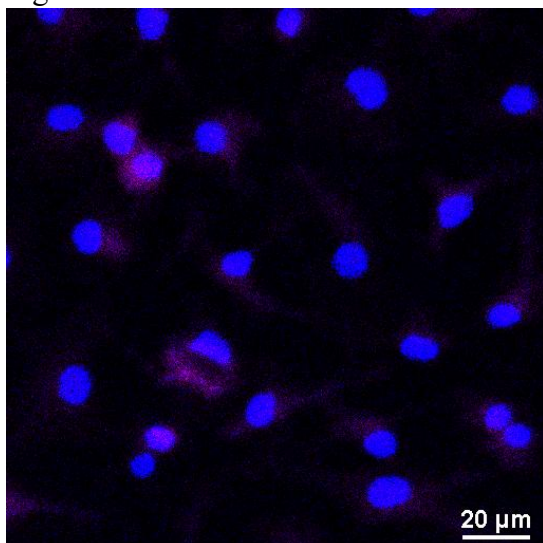

Figure 3f GPR91<sup>-/-</sup> DAPI

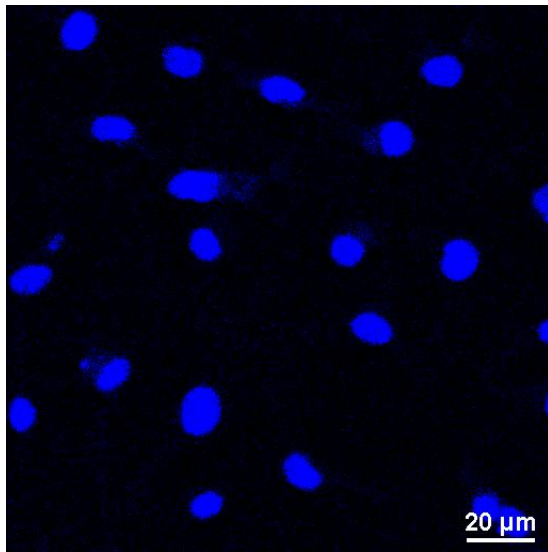

Figure 3f GPR91<sup>-/-</sup> iNOS

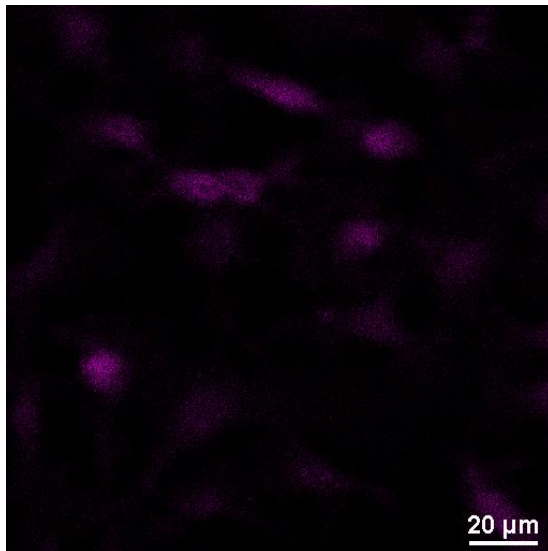

Figure 3f GPR91<sup>-/-</sup> MERGE

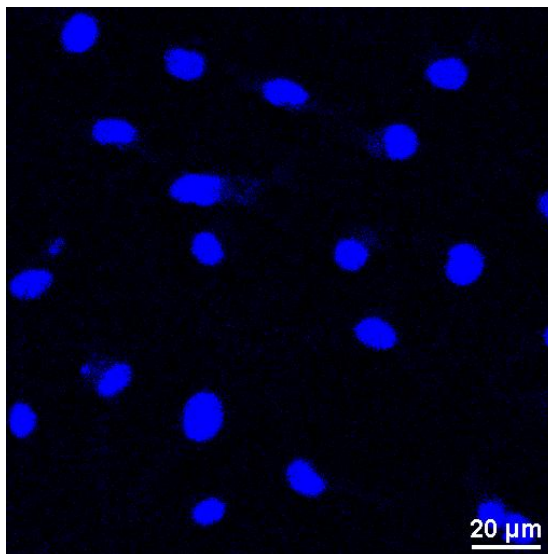

Figure 3f WT+*P.g.* DAPI

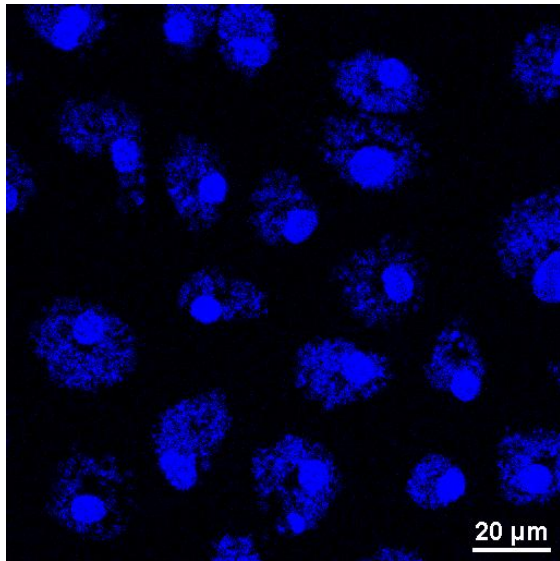

Figure 3f WT+*P.g.* iNOS

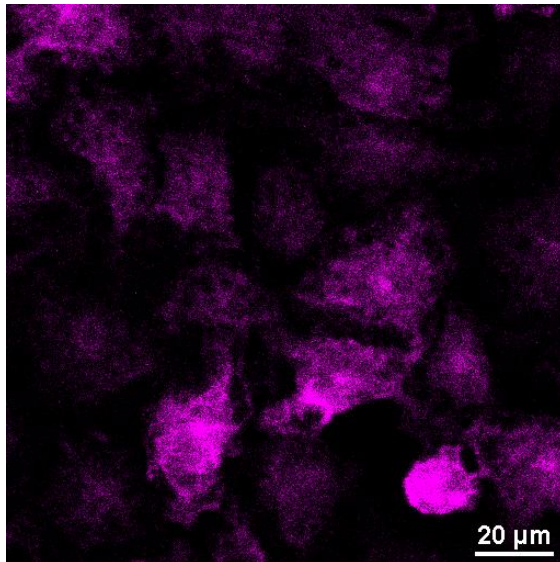

Figure 3f WT+*P.g.* MERGE

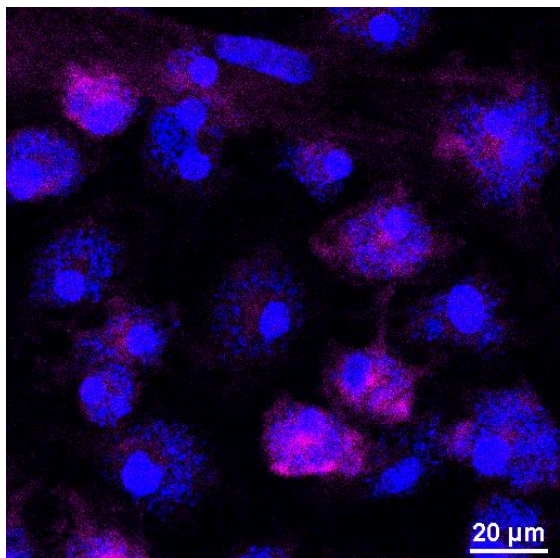

Figure 3f GPR91<sup>-/+</sup>+*P.g.* DAPI

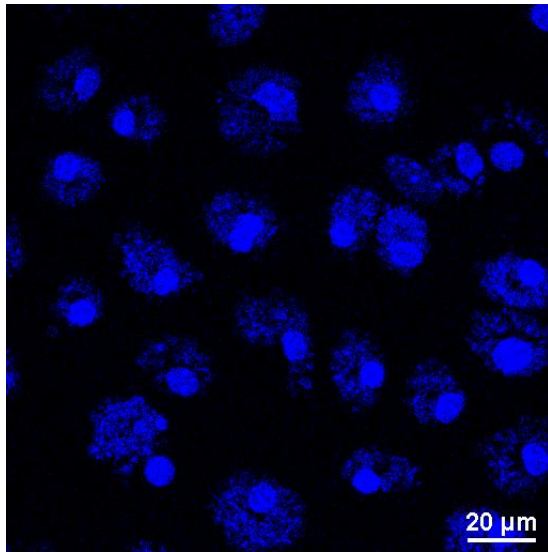

Figure 3f GPR91<sup>-/+</sup>+*P.g.* iNOS

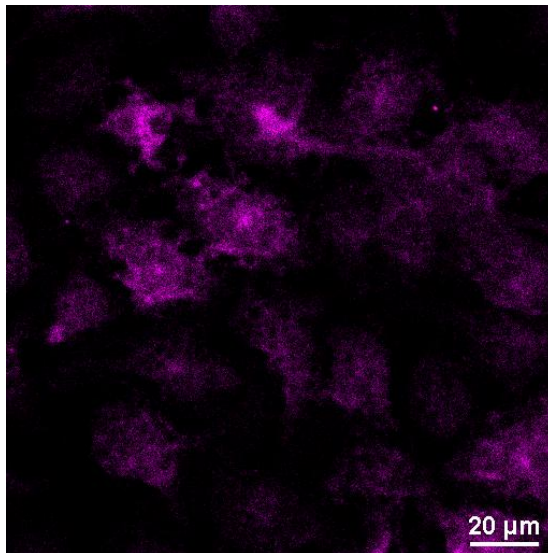

Figure 3f GPR91<sup>-/+</sup>+*P.g.* MERGE

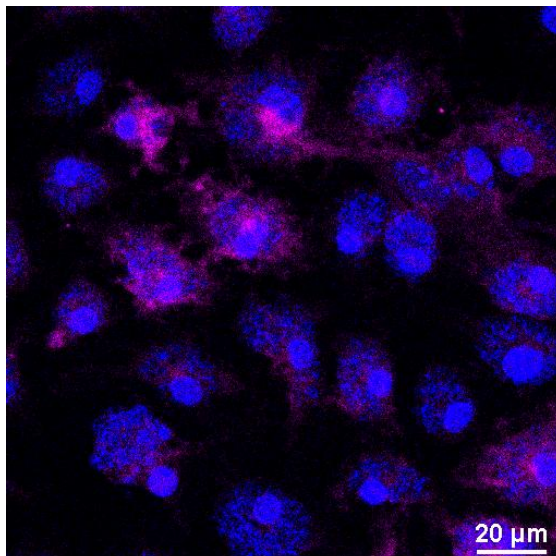



Figure 4b WT ROS

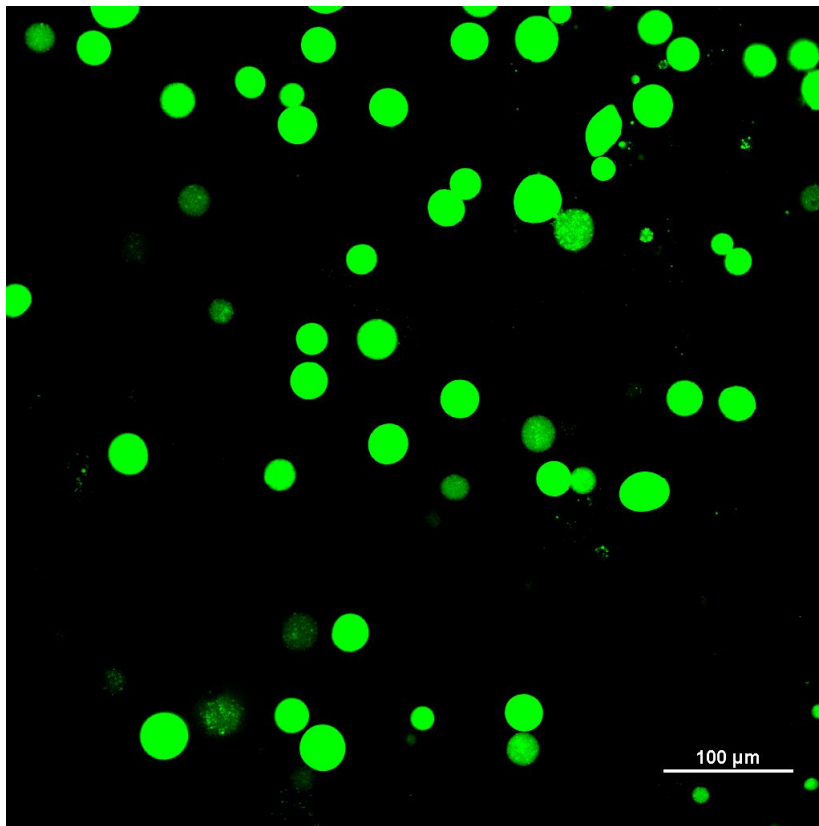

Figure 4b GPR91<sup>-/-</sup> ROS

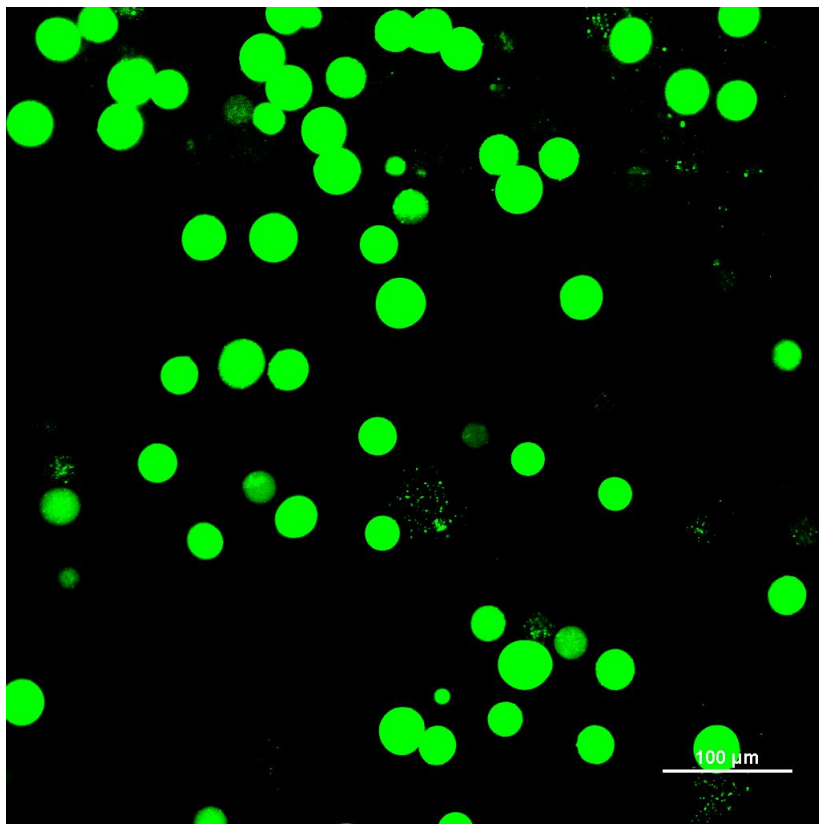

Figure 4b WT+*P.g.* ROS

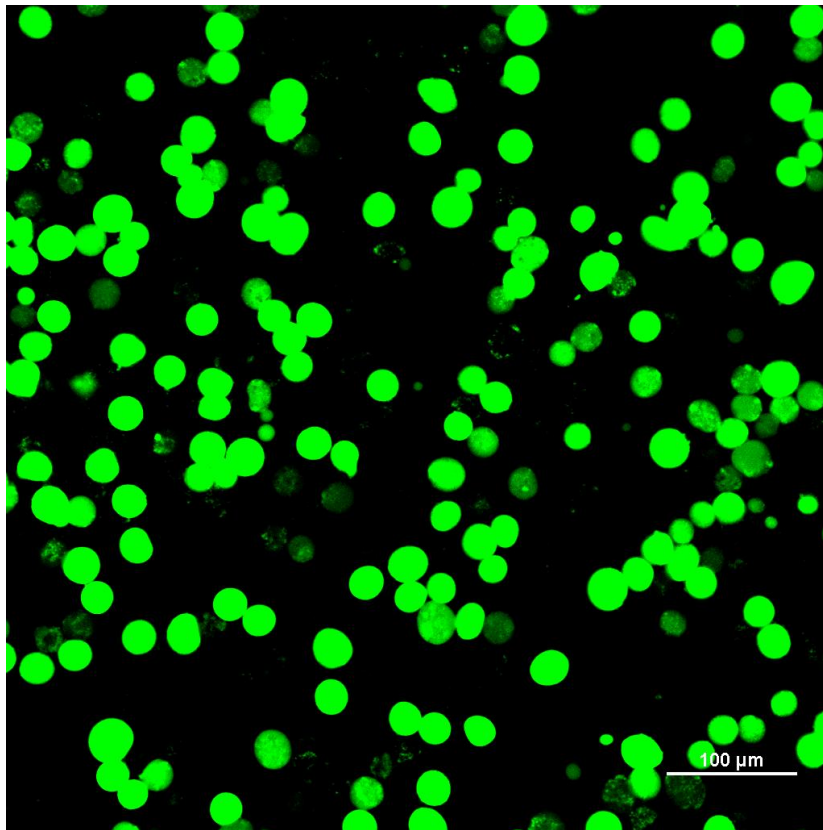

Figure 4b GPR91<sup>-/+</sup>+*P.g.* ROS

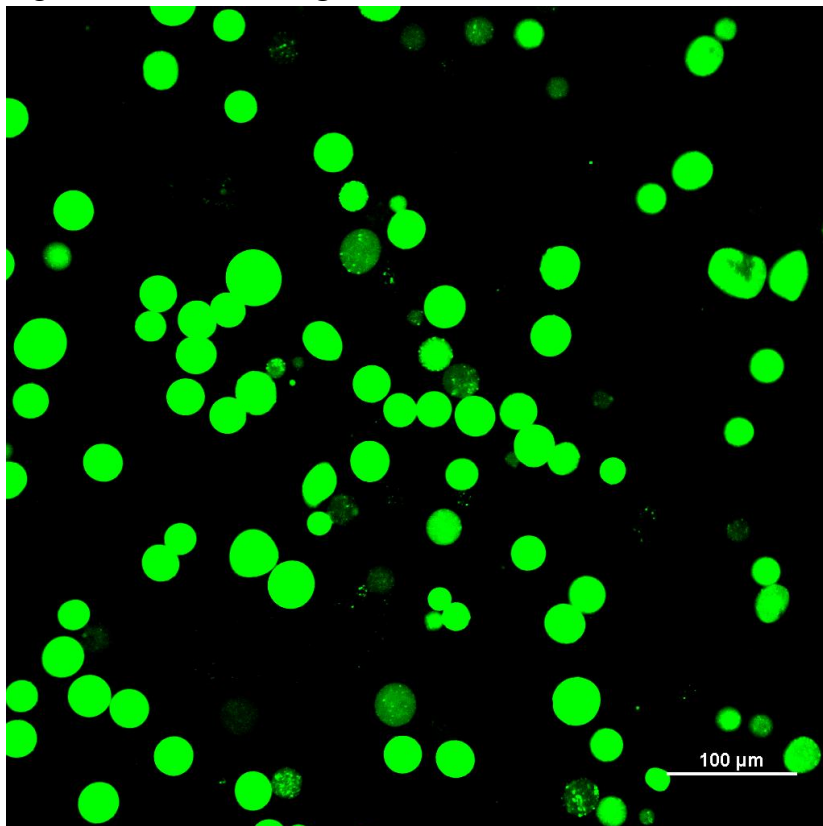



Figure 5d Ctrl DAPI

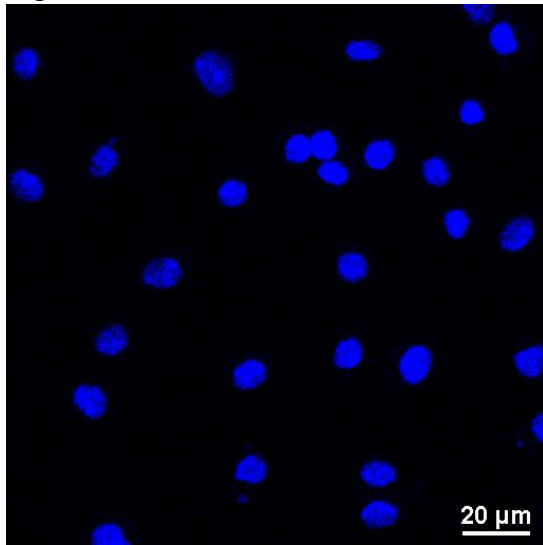

Figure 5d Ctrl p-ERK

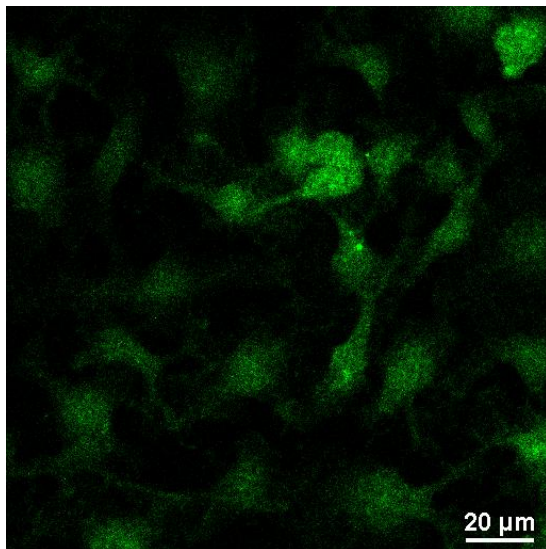

Figure 5d Ctrl MERGE

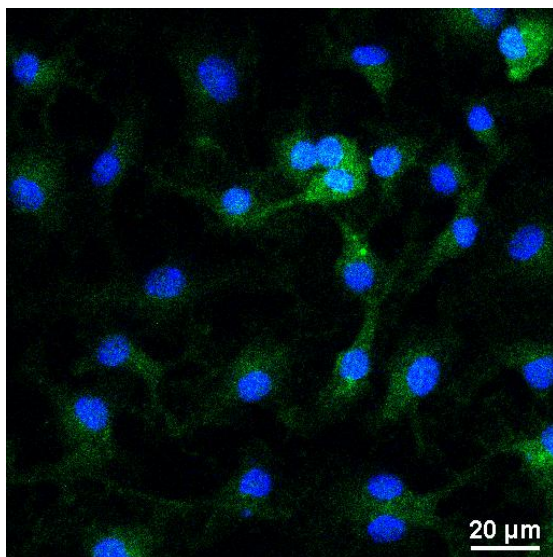

Figure 5d 4C DAPI

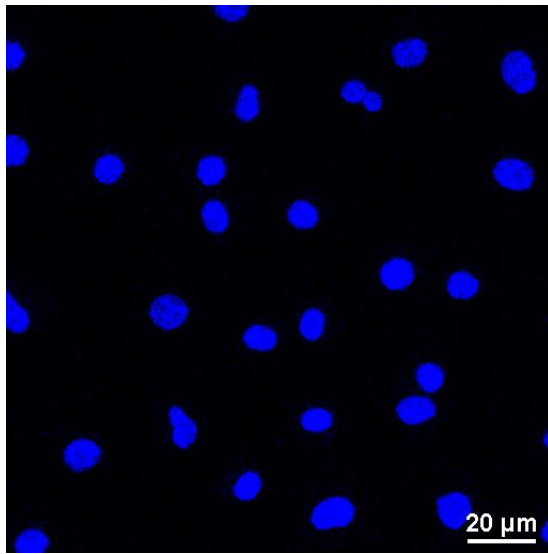

Figure 5d 4C p-ERK

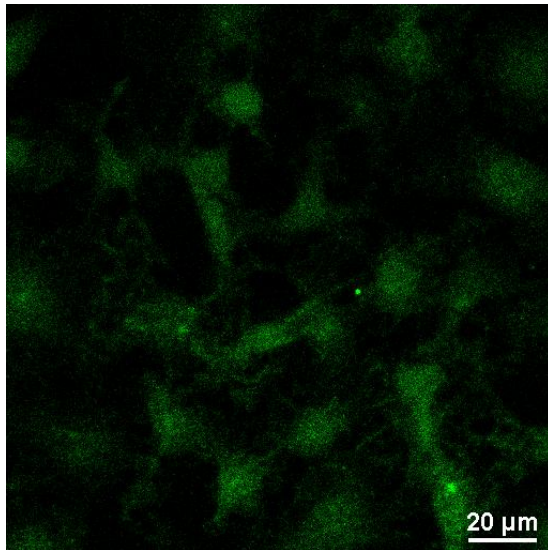

Figure 5d 4C MERGE

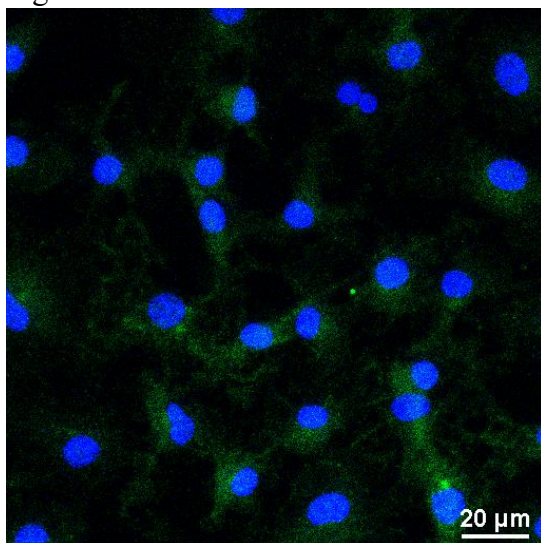

Figure 5d *P.g.* DAPI

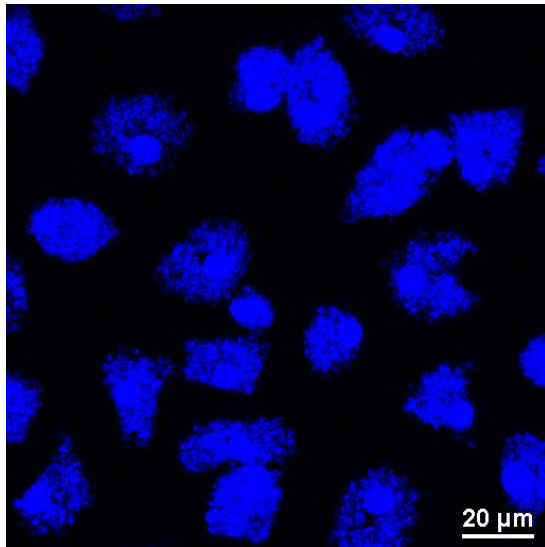

Figure 5d *P.g.* p-ERK

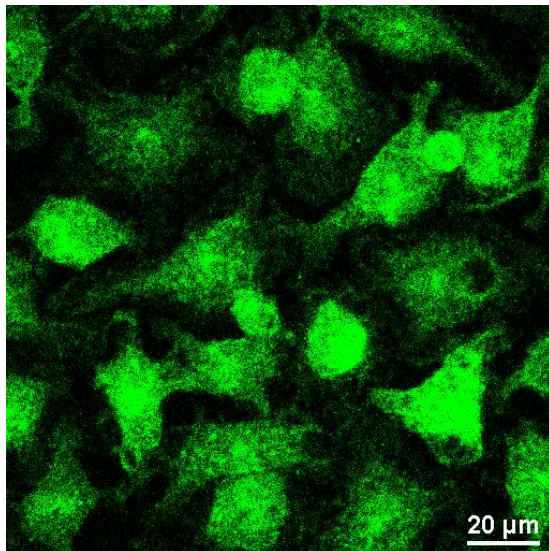

Figure 5d *P.g.* MERGE

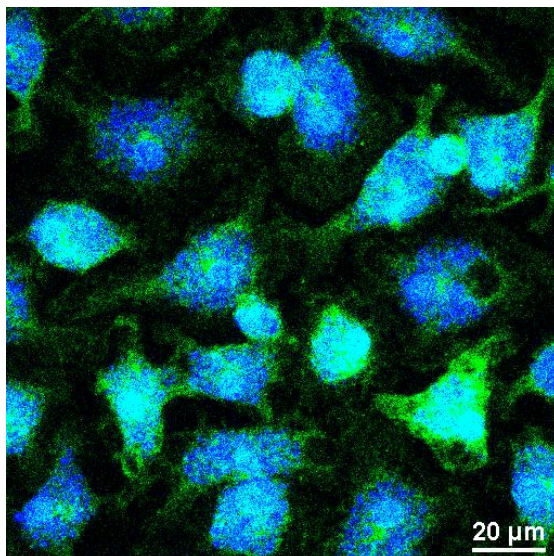



Figure 5d *P.g.*+4C DAPI

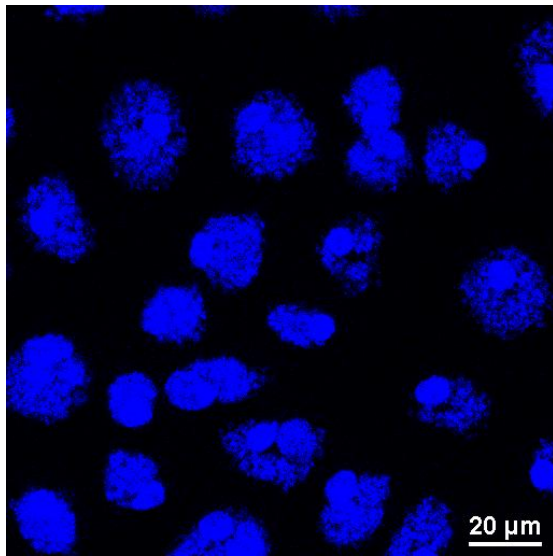

Figure 5d *P.g.*+4C p-ERK

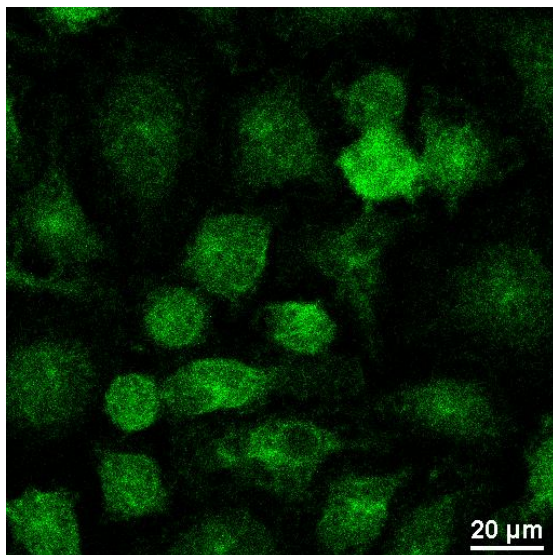

Figure 5d *P.g.*+4C MERGE

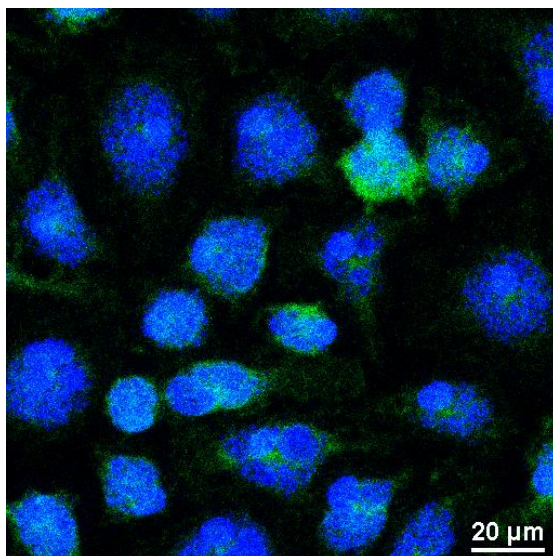

Figure 5e WT DAPI

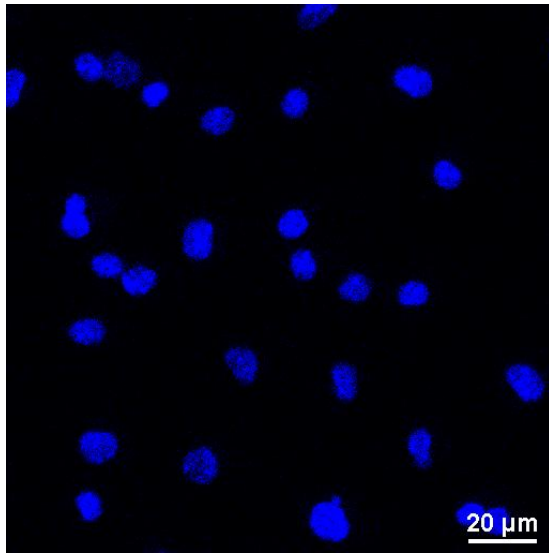

Figure 5e WT p-ERK

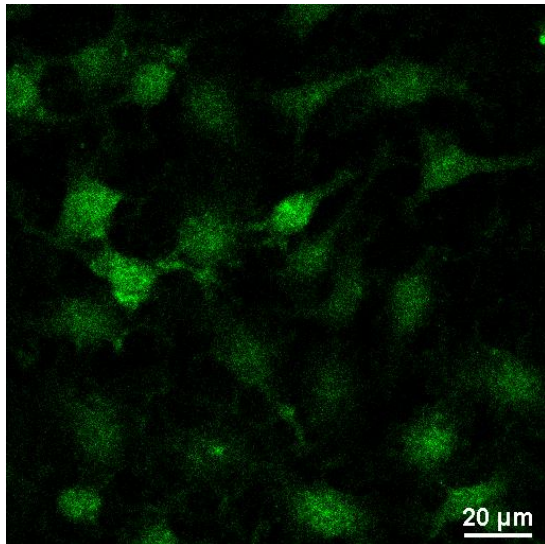

Figure 5e WT MERGE

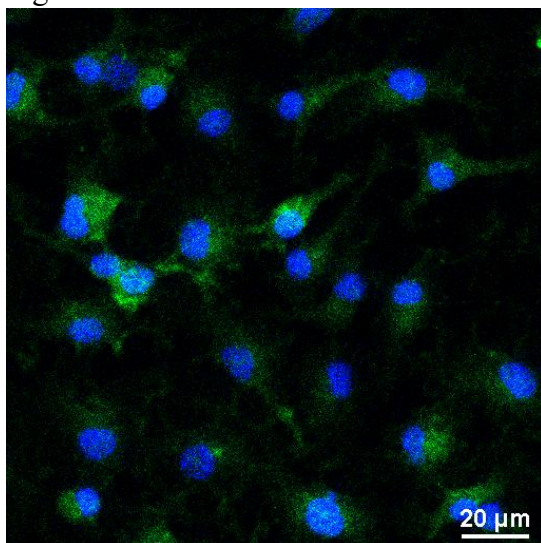

Figure 5e GPR91<sup>-/-</sup> DAPI

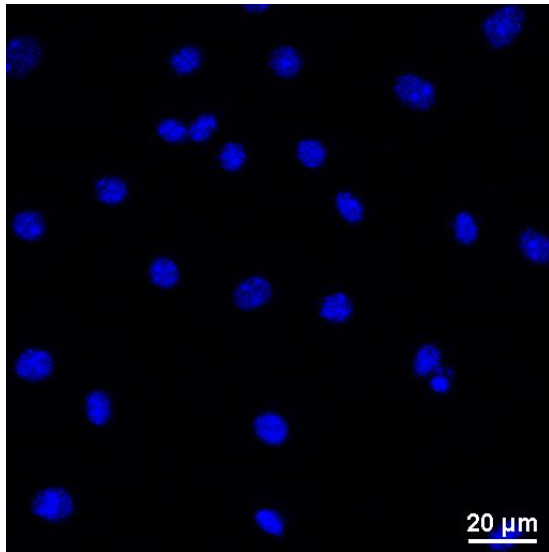

Figure 5e GPR91<sup>-/-</sup> p-ERK

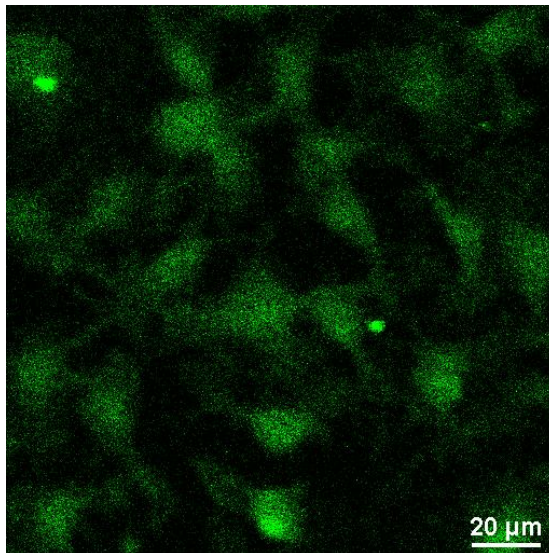

Figure 5e GPR91<sup>-/-</sup> MERGE

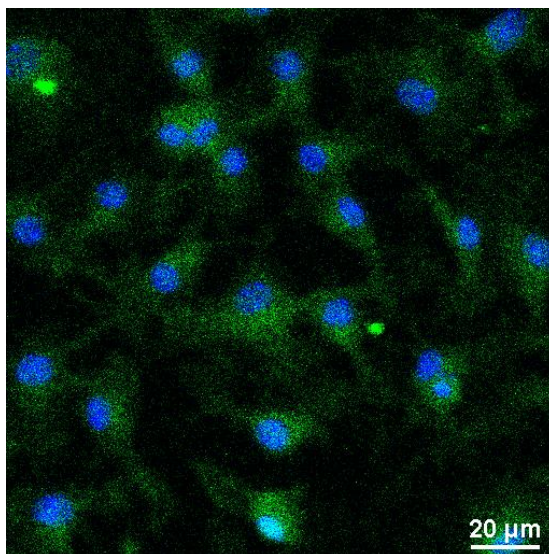



Figure 5e WT+ *P.g.* DAPI

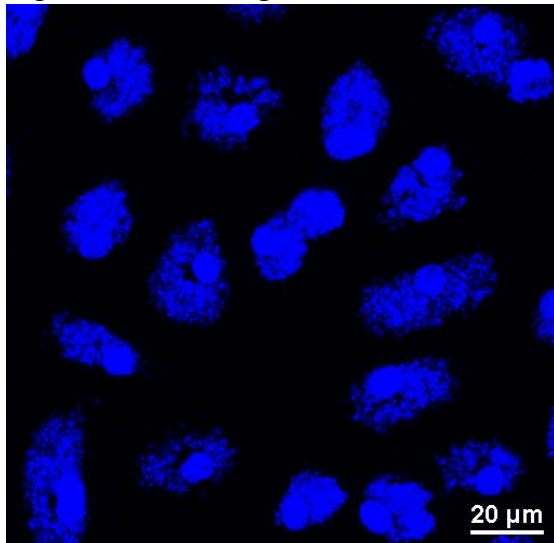

Figure 5e WT+ *P.g.* p-ERK

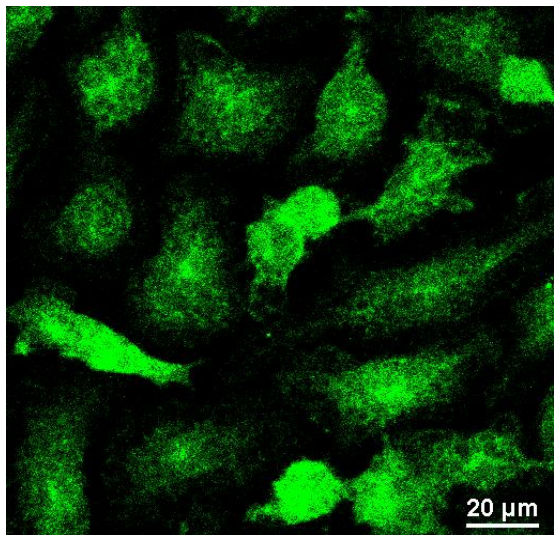

Figure 5e WT+ *P.g.* MERGE

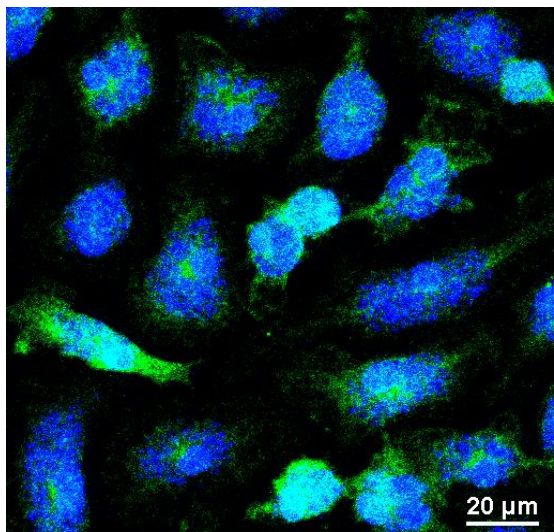

Figure 5e GPR91<sup>-/+</sup> *P.g.* DAPI

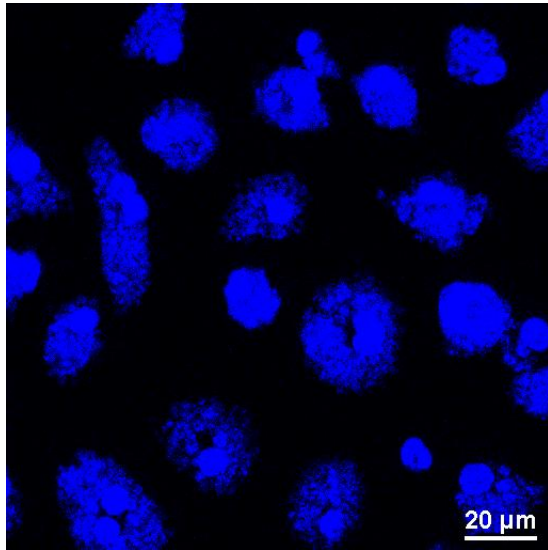

Figure 5e GPR91<sup>-/+</sup> *P.g.* p-ERK

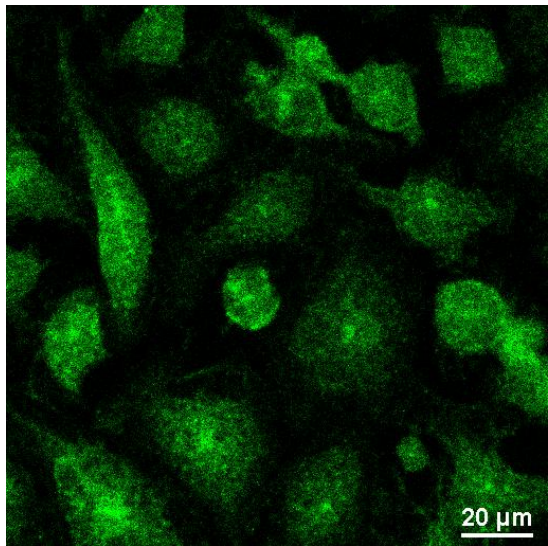

Figure 5e GPR91<sup>-/+</sup> *P.g.* MERGE

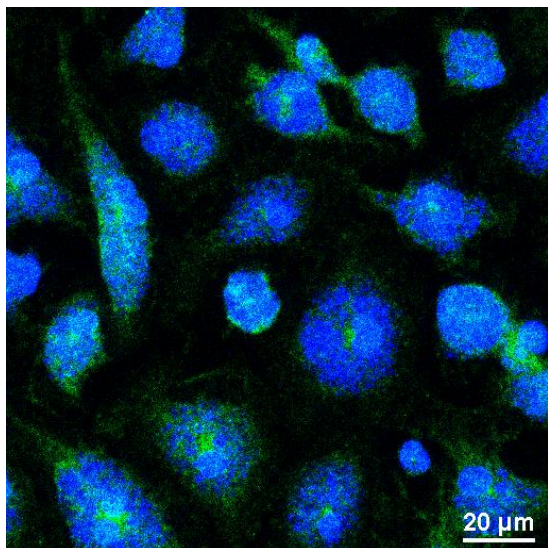

Figure 5f Ctrl DAPI

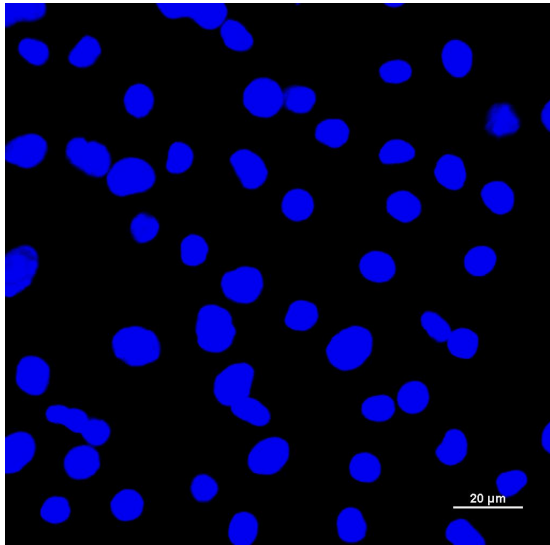

Figure 5f Ctrl p-P65

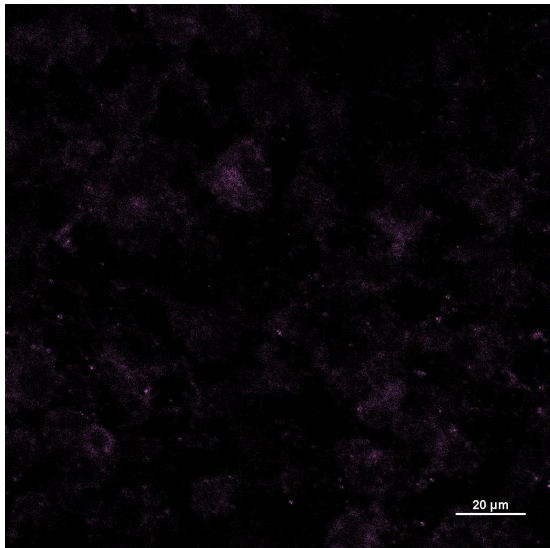

Figure 5f Ctrl MERGE

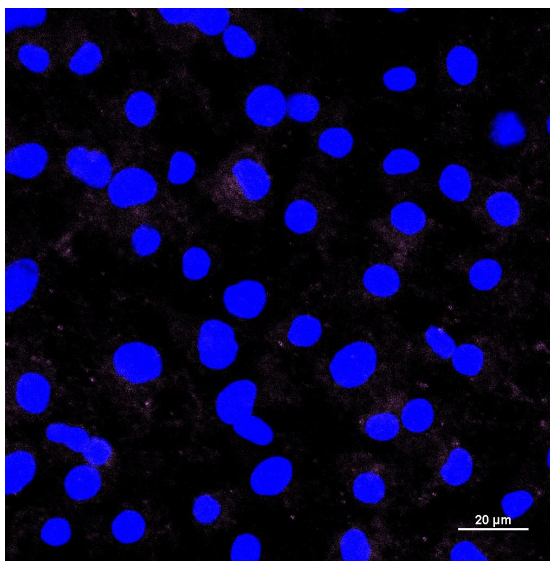



Figure 5f 4C DAPI

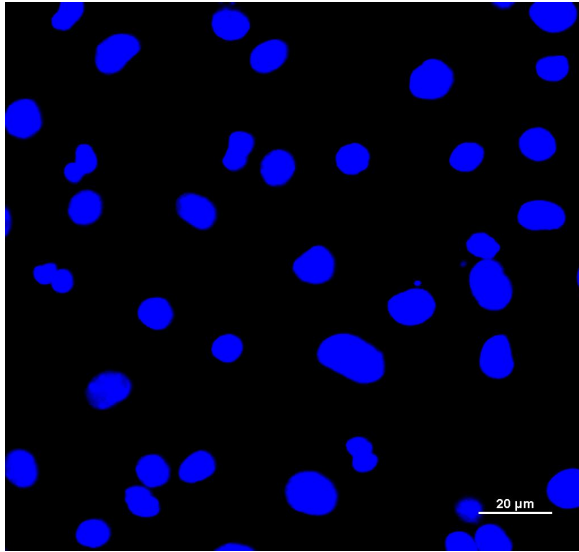

Figure 5f 4C p-P65

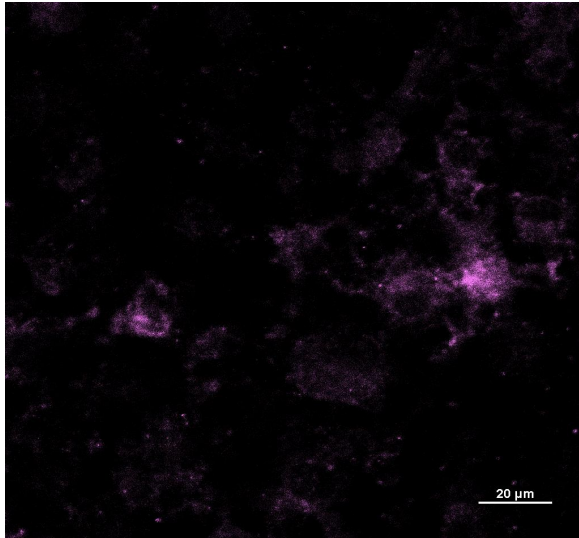

Figure 5f 4C MERGE

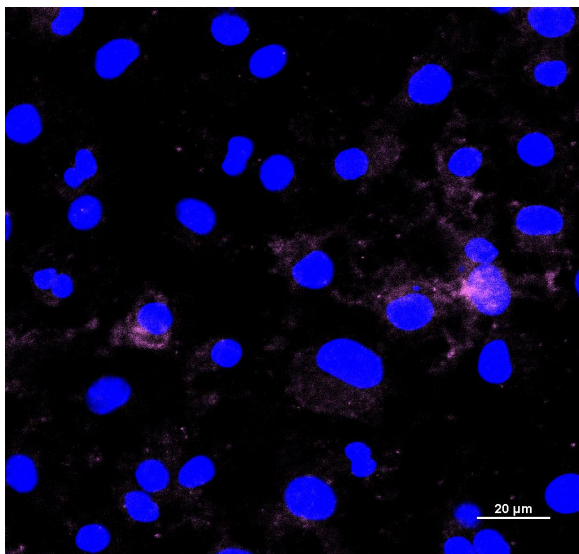

Figure 5f *P.g.* DAPI

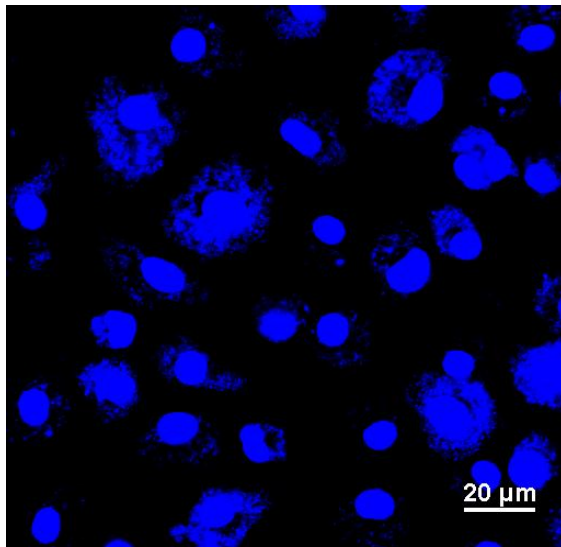

Figure 5f *P.g.* p-P65

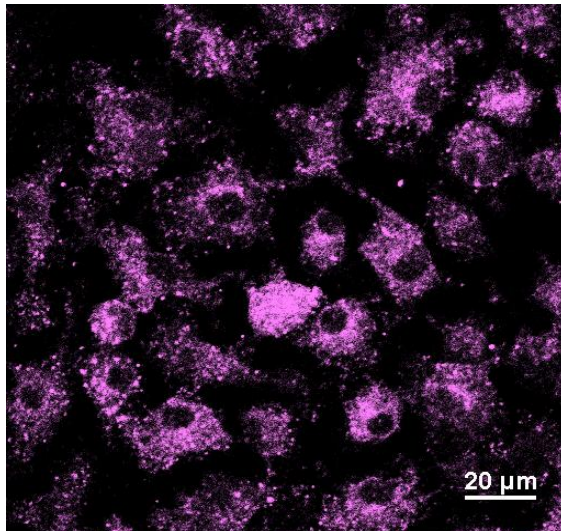

Figure 5f *P.g.* MERGE

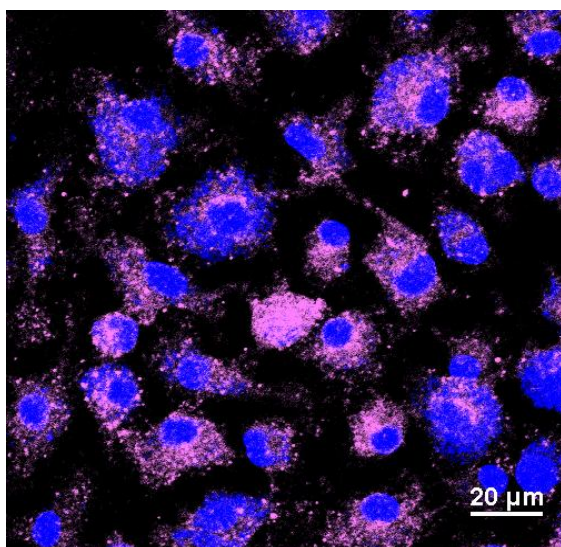

Figure 5f *P.g.*+4C DAPI

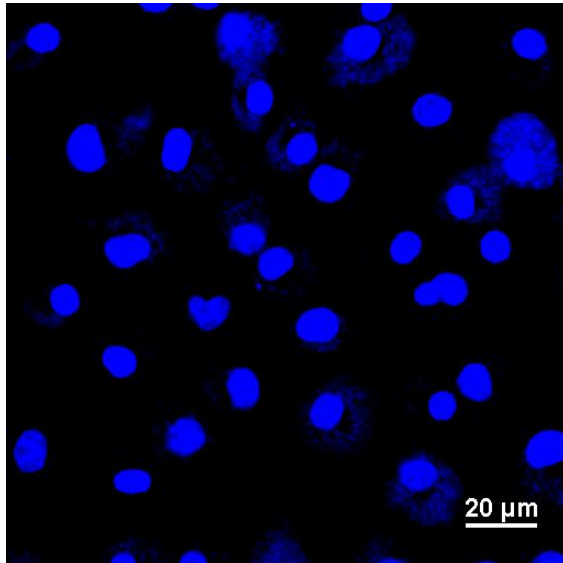

Figure 5f *P.g.*+4C p-P65

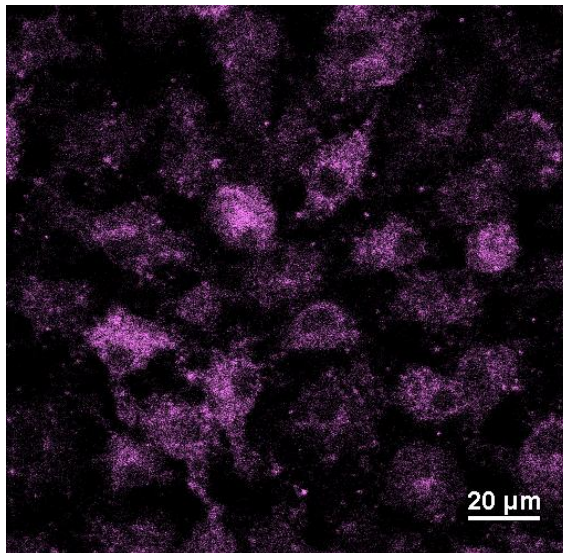

Figure 5f *P.g.*+4C MERGE

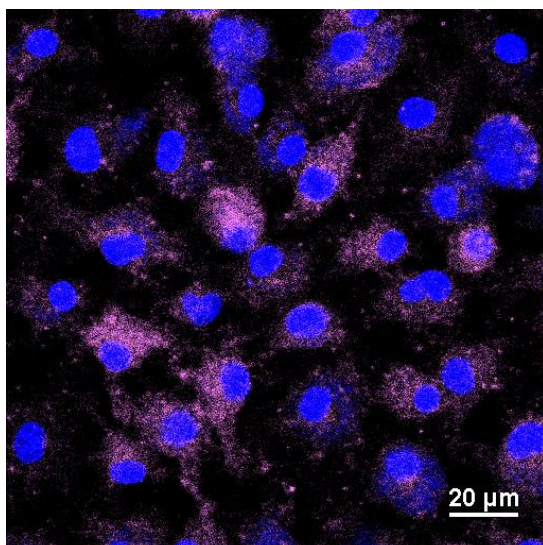



Figure 5g WT DAPI

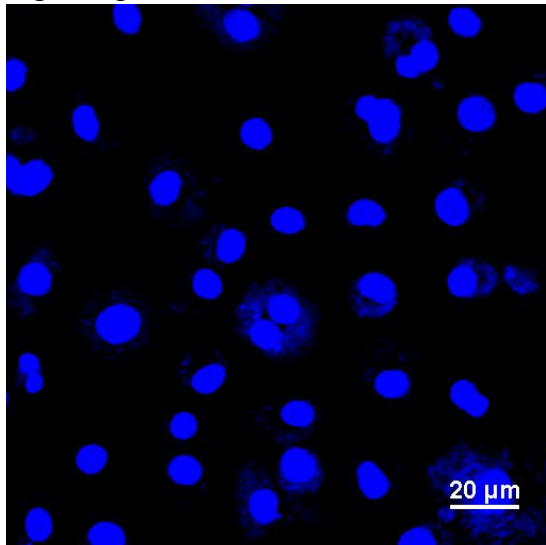

Figure 5g WT p-P65

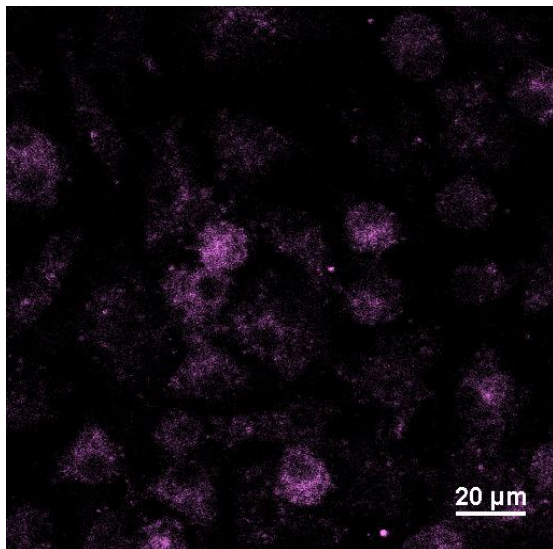

Figure 5g WT MERGE

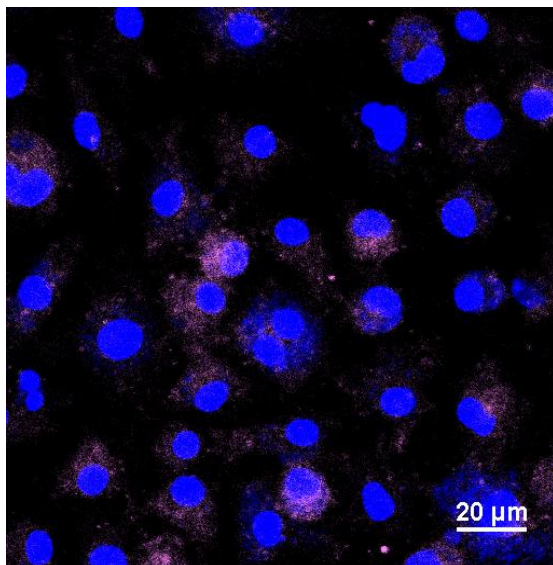

Figure 5g GPR91<sup>-/-</sup> DAPI

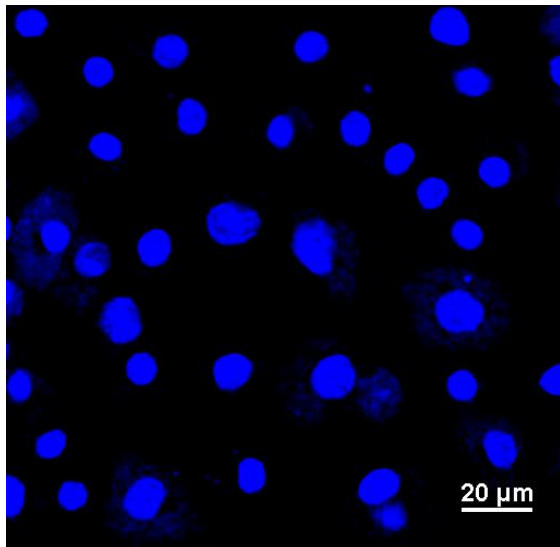

Figure 5g GPR91<sup>-/-</sup> p-P65

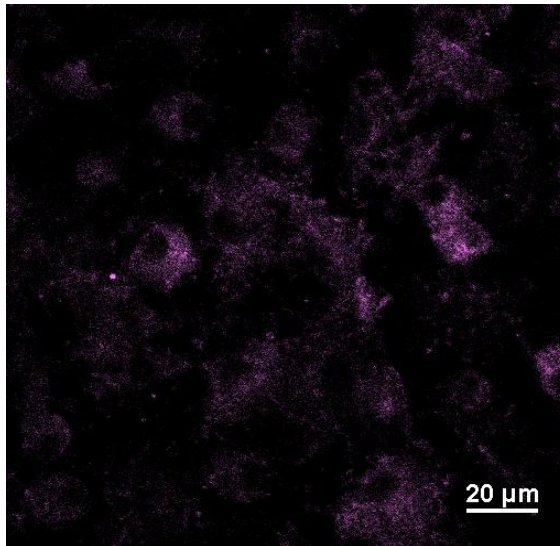

Figure 5g GPR91<sup>-/-</sup> MERGE

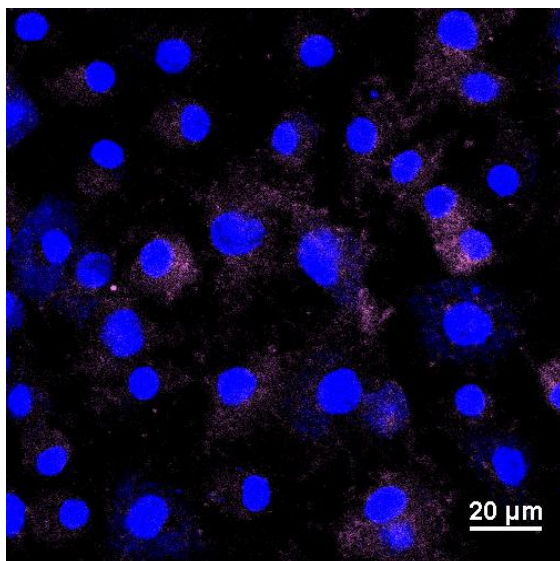

Figure 5g WT+ *P.g.* DAPI

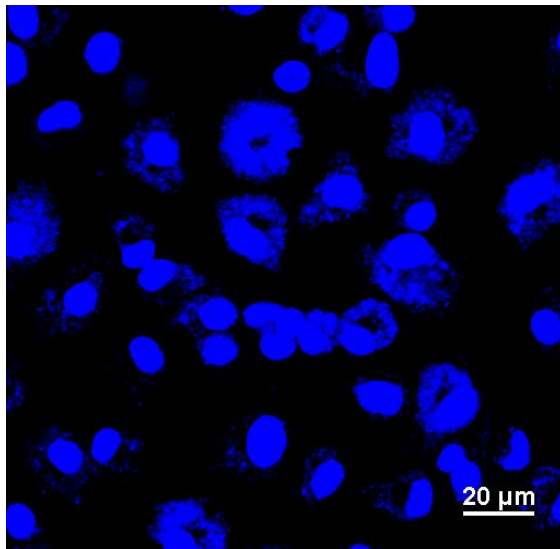

Figure 5g WT+ *P.g.* p-P65

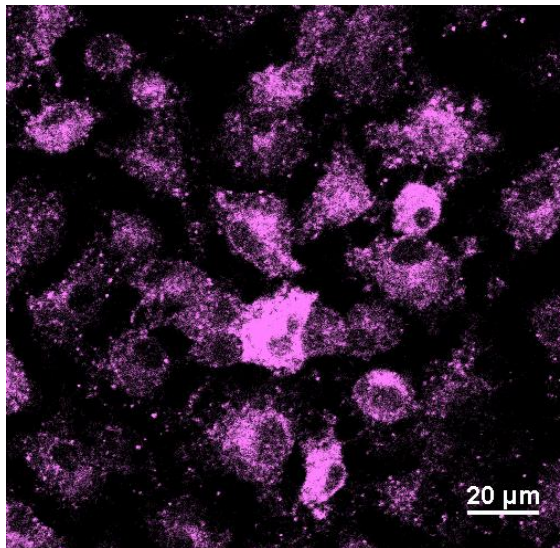

Figure 5g WT+ *P.g.* MERGE

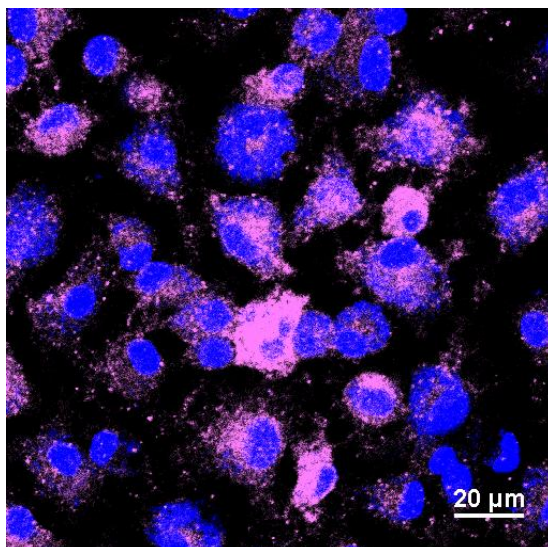



Figure 5g GPR91<sup>-/+</sup> *P.g.* DAPI

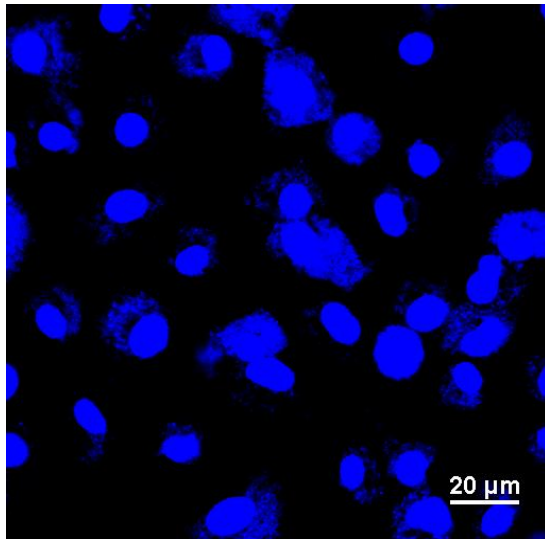

Figure 5g GPR91<sup>-/+</sup> *P.g.* p-P65

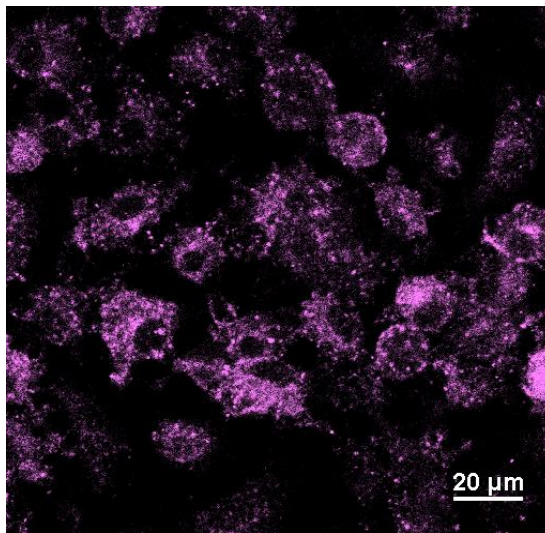

Figure 5g GPR91<sup>-/+</sup> *P.g.* MERGE

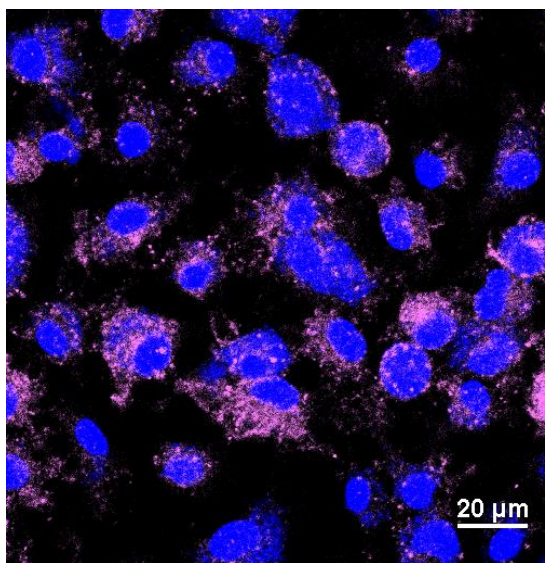

Supplement: mmc3.pdf [file mmc3.pdf]
