# Supplementary figures and images for: G protein-coupled receptor 91 promotes the inflammatory response to Porphyromonas gingivalis in bone marrow-derived macrophages
Source: PubMed Central journal article supplement — Heliyon. 2024 Jul 14;10(14):e34509. doi: 10.1016/j.heliyon.2024.e34509 (PMC11577564; doi:10.1016/j.heliyon.2024.e34509), 2024-07-14

Figure1d 图 h

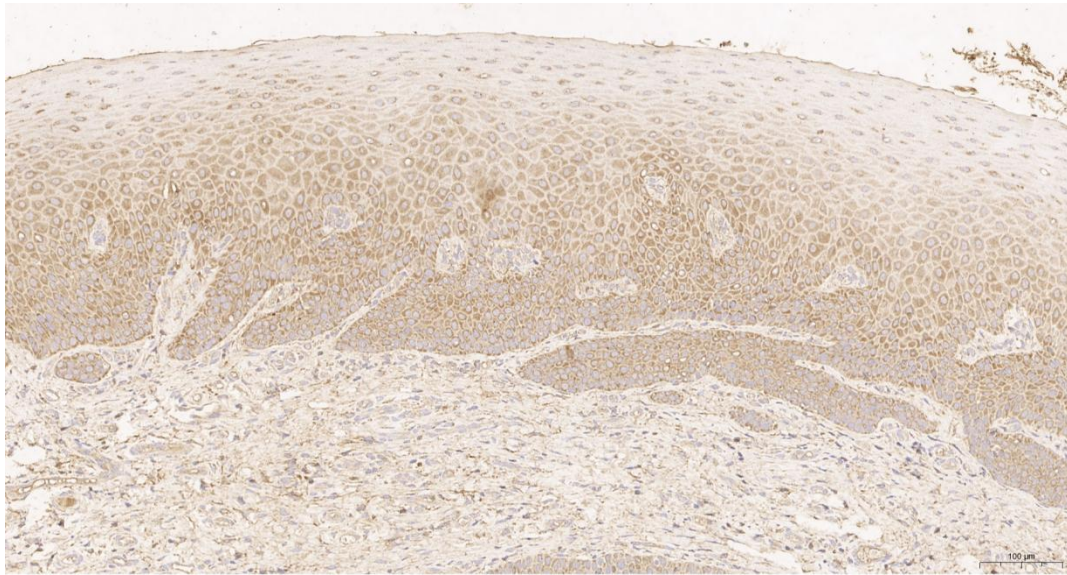

Figure1d 图 h1

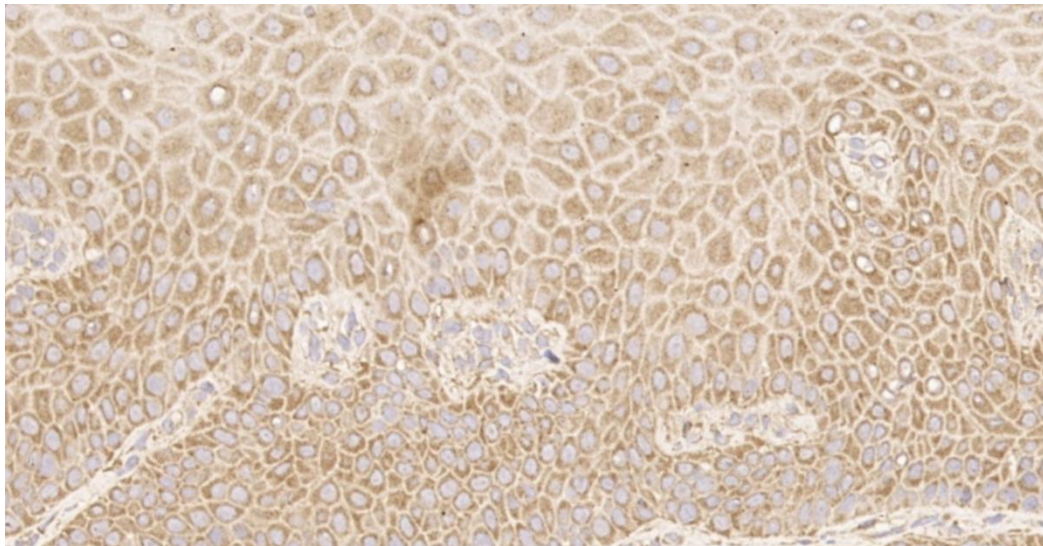

Figure1d 图 h2

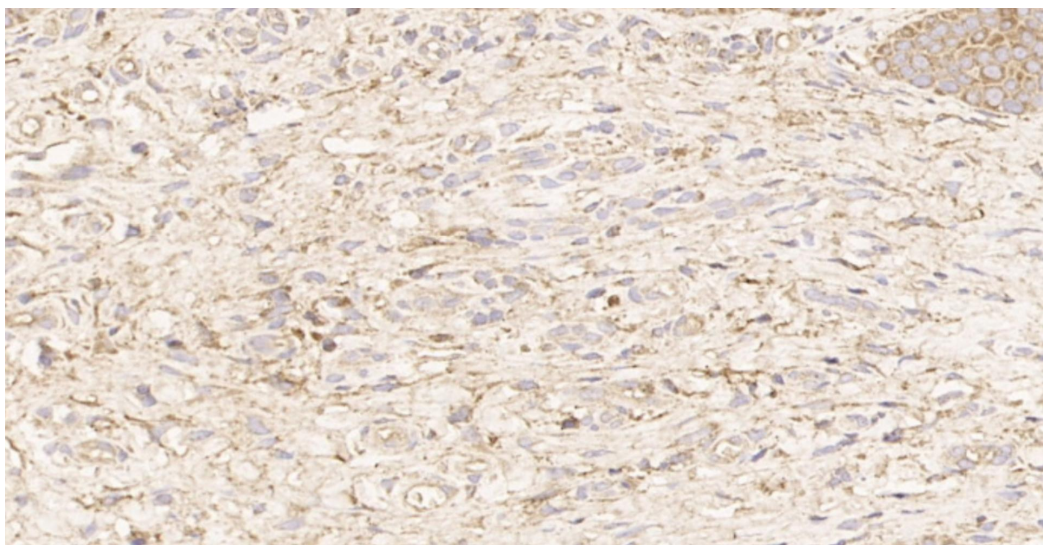



Figure1d 图 p

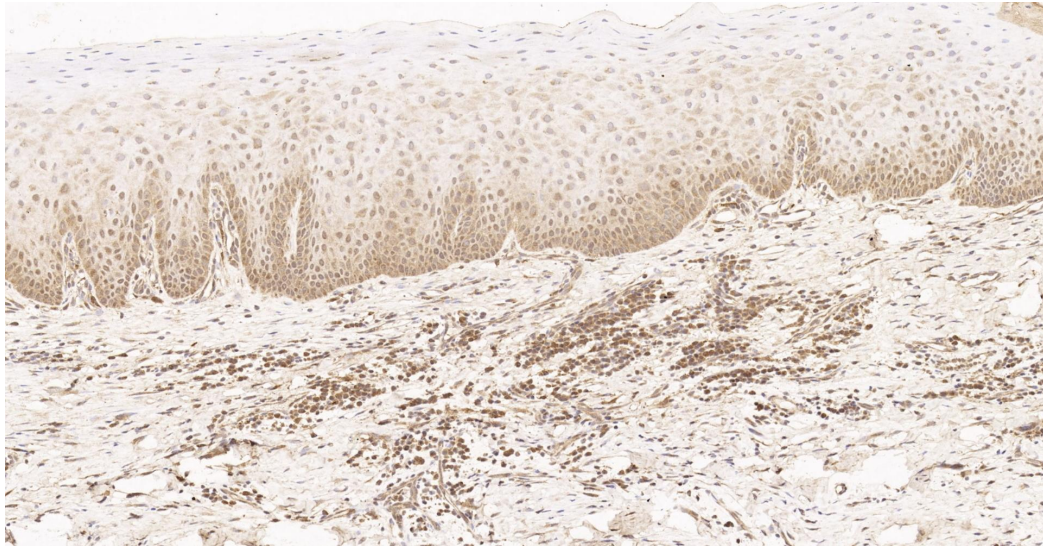

Figure1d 图 p1

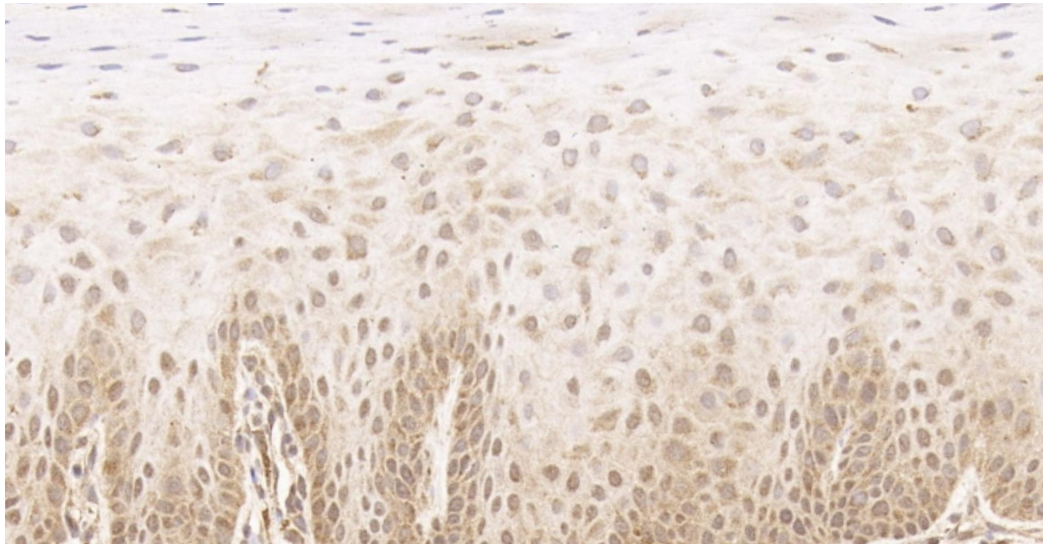

Figure1d 图 p2

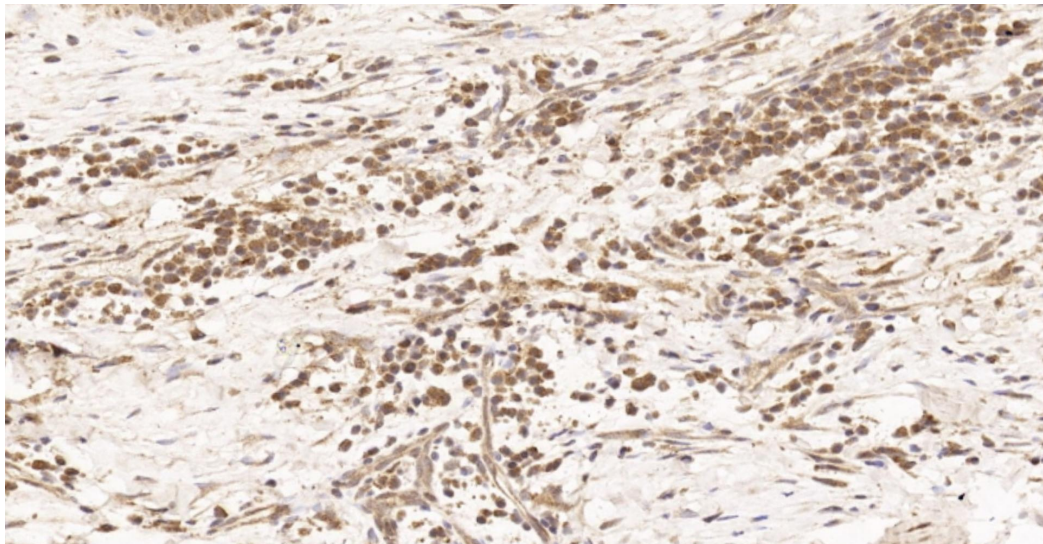

Supplement: mmc2.pdf [file mmc2.pdf]
